# 1 Testing for ancient selection using cross-population allele 2 frequency differentiation

3 Fernando Racimo<sup>1,\*</sup>

4 1 Department of Integrative Biology, University of California, Berkeley, CA, USA

5 \* E-mail: [fernandoracimo@gmail.com](mailto:fernandoracimo@gmail.com)

## 6 1 Abstract

7 A powerful way to detect selection in a population is by modeling local allele frequency changes in a  
8 particular region of the genome under scenarios of selection and neutrality, and finding which model is  
9 most compatible with the data. Chen et al. [1] developed a composite likelihood method called XP-CLR  
10 that uses an outgroup population to detect departures from neutrality which could be compatible with  
11 hard or soft sweeps, at linked sites near a beneficial allele. However, this method is most sensitive to recent  
12 selection and may miss selective events that happened a long time ago. To overcome this, we developed  
13 an extension of XP-CLR that jointly models the behavior of a selected allele in a three-population tree.  
14 Our method - called 3P-CLR - outperforms XP-CLR when testing for selection that occurred before two  
15 populations split from each other, and can distinguish between those events and events that occurred  
16 specifically in each of the populations after the split. We applied our new test to population genomic  
17 data from the 1000 Genomes Project, to search for selective sweeps that occurred before the split of  
18 Africans and Eurasians, but after their split from Neanderthals, and that could have presumably led to  
19 the fixation of modern-human-specific phenotypes. We also searched for sweep events that occurred in  
20 East Asians, Europeans and the ancestors of both populations, after their split from Africans.

## 21 2 Introduction

22 Genetic hitchhiking will distort allele frequency patterns at regions of the genome linked to a beneficial  
23 allele that is rising in frequency [2]. This is known as a selective sweep. If the sweep is restricted to a  
24 particular population and does not affect other closely related populations, one can detect such an event  
25 by looking for extreme patterns of localized population differentiation, like high values of  $F_{st}$  at a specific  
26 locus [3]. This and other related statistics have been used to scan the genomes of present-day humans

27 from different populations, so as to detect signals of recent positive selection [4–7].

28       Once it became possible to sequence entire genomes of archaic humans (like Neanderthals) [8–10],  
 29 researchers also began to search for selective sweeps that occurred in the ancestral population of all  
 30 present-day humans. For example, ref. [8] searched for genomic regions with a depletion of derived  
 31 alleles in a low-coverage Neanderthal genome, relative to what would be expected given the derived allele  
 32 frequency in present-day humans. This is a pattern that would be consistent with a sweep in present-  
 33 day humans. Later on, ref. [10] developed a hidden Markov model (HMM) that could identify regions  
 34 where Neanderthals fall outside of all present-day human variation (also called “external regions”), and  
 35 are therefore likely to have been affected by ancient sweeps in early modern humans. They applied  
 36 their method to a high-coverage Neanderthal genome. Then, they ranked these regions by their genetic  
 37 length, to find segments that were extremely long, and therefore highly compatible with a selective sweep.  
 38 Finally, ref. [11] used summary statistics calculated in the neighborhood of sites that were ancestral in  
 39 archaic humans but fixed derived in all or almost all present-day humans, to test if any of these sites  
 40 could be compatible with a selective sweep model. While these methods harnessed different summaries  
 41 of the patterns of differentiation left by sweeps, they did not attempt to explicitly model the process by  
 42 which these patterns are generated over time.

43       Chen et al. [1] developed a method called XP-CLR, which is designed to test for selection in one  
 44 population after its split from a second, outgroup, population  $t_{AB}$  generations ago. It does so by modeling  
 45 the evolutionary trajectory of an allele under linked selection and under neutrality, and then comparing  
 46 the likelihood of the data under each of the two models. The method detects local allele frequency  
 47 differences that are compatible with the linked selection model [2], along windows of the genome.

48       XP-CLR is a powerful test for detecting selective events restricted to one population. However, it  
 49 provides little information about when these events happened, as it models all sweeps as if they had  
 50 immediately occurred in the present generation. Additionally, if one is interested in selective sweeps  
 51 that took place before two populations  $a$  and  $b$  split from each other, one would have to run XP-CLR  
 52 separately on each population, with a third outgroup population  $c$  that split from the ancestor of  $a$  and  
 53  $b$   $t_{ABC}$  generations ago (with  $t_{ABC} > t_{AB}$ ). Then, one would need to check that the signal of selection  
 54 appears in both tests. This may miss important information about correlated allele frequency changes  
 55 shared by  $a$  and  $b$ , but not by  $c$ , limiting the power to detect ancient events.

56       To overcome this, we developed an extension of XP-CLR that jointly models the behavior of an allele

in all 3 populations, to detect selective events that occurred before or after the closest two populations split from each other. Below we briefly review the modeling framework of XP-CLR and describe our new test, which we call 3P-CLR. In the Results, we show this method outperforms XP-CLR when testing for selection that occurred before the split of two populations, and can distinguish between those events and events that occurred after the split, unlike XP-CLR. We then apply the method to population genomic data from the 1000 Genomes Project [12], to search for selective sweep events that occurred before the split of Africans and Eurasians, but after their split from Neanderthals. We also use it to search for selective sweeps that occurred in the Eurasian ancestral population, and to distinguish those from events that occurred specifically in East Asians or specifically in Europeans.

## 3 Methods

### 3.1 XP-CLR

First, we review the procedure used by XP-CLR to model the evolution of allele frequency changes of two populations  $a$  and  $b$  that split from each other  $t_{AB}$  generations ago (Figure 1.A). For neutral SNPs, Chen et al. [1] use an approximation to the Wright-Fisher diffusion dynamics [13]. Namely, the frequency of a SNP in a population  $a$  ( $p_A$ ) in the present is treated as a random variable governed by a normal distribution with mean equal to the frequency in the ancestral population ( $\beta$ ) and variance proportional to the drift time  $\omega$  from the ancestral to the present population:

$$p_A|\beta \sim N(\beta, \omega\beta(1-\beta)) \quad (1)$$

where  $\omega = t_{AB}/(2N_e)$  and  $N_e$  is the effective size of population A.

If a SNP is segregating in both populations - i.e. has not hit the boundaries of fixation or extinction - this process is time-reversible. Thus, one can model the frequency of the SNP in population  $a$  with a normal distribution having mean equal to the frequency in population  $b$  and variance proportional to the sum of the drift time ( $\omega$ ) between  $a$  and the ancestral population, and the drift time between  $b$  and the ancestral population ( $\psi$ ):

$$p_A|p_B \sim N(p_B, (\omega + \psi)p_B(1-p_B)) \quad (2)$$

For SNPs that are linked to a beneficial allele that has undergone a sweep in population  $a$  only, Chen et al. [1] model the allele as evolving neutrally until the present and then apply a transformation to the normal distribution that depends on the distance to the selected allele  $r$  and the strength of selection  $s$  [14, 15]. Let  $c = 1 - q_0^{r/2}$  where  $q_0$  is the frequency of the beneficial allele in population  $a$  before the sweep begins. The frequency of a neutral allele is expected to increase from  $p$  to  $1 - c + cp$  if the allele is linked to the beneficial allele, and this occurs with probability equal to the frequency of the neutral allele ( $p$ ) before the sweep begins. Otherwise, the frequency of the neutral allele is expected to decrease from  $p$  to  $cp$ . This leads to the following transformation of the normal distribution:

$$f(p_A|p_B, r, s, \omega, \psi) = \frac{1}{\sqrt{2\pi}\sigma} \frac{p_A + c - 1}{c^2} e^{-\frac{(p_A + c - 1 - cp_B)^2}{2c^2\sigma^2}} I_{[1-c, 1]}(p_A) + \frac{1}{\sqrt{2\pi}\sigma} \frac{c - p_A}{c^2} e^{-\frac{(p_A - cp_B)^2}{2c^2\sigma^2}} I_{[0, c]}(p_A) \quad (3)$$

where  $\sigma^2 = (\omega + \psi)p_b(1 - p_b)$  and  $I_{[x, y]}(z)$  is 1 on the interval  $[x, y]$  and 0 otherwise.

For  $s \rightarrow 0$  or  $r \gg s$ , this distribution converges to the neutral case. Let  $\mathbf{v}$  be the vector of all drift times that are relevant to the scenario we are studying. In this case, it will be equal to  $(\omega, \psi)$  but in more complex cases below, it may include additional drift times. Let  $\mathbf{r}$  be the vector of recombination fractions between the beneficial alleles and each of the SNPs within a window of arbitrary size. We can then calculate the product of likelihoods over all  $k$  SNPs in that window for either the neutral or the linked selection model, after binomial sampling of alleles from the population frequency, and conditioning on the event that the allele is segregating in the population:

$$CL_{XP-CLR}(\mathbf{r}, \mathbf{v}, s) = \prod_{j=1}^k \frac{\int_0^1 f(p_A^j|p_B^j, \mathbf{v}, s, r^j) \binom{n}{m_j} (p_A^j)^{m_j} (1 - p_A^j)^{n-m_j} dp_A^j}{\int_0^1 f(p_A^j|p_B^j, \mathbf{v}, s, r^j) dp_A^j} \quad (4)$$

We note that the denominator in the above equation is not explicitly stated in ref. [1] for ease of notation, but appears in the published online implementation of the method. Because we are ignoring the correlation in frequencies produced by linkage, this is a composite likelihood [16, 17]. Finally, we obtain a composite likelihood ratio statistic  $S_{XP-CLR}$  of the hypothesis of linked selection over the hypothesis of neutrality:

$$S_{XP-CLR} = 2[\sup_{\mathbf{r}, \mathbf{v}, s} \log(CL_{XP-CLR}(\mathbf{r}, \mathbf{v}, s)) - \sup_{\mathbf{v}} \log(CL_{XP-CLR}(\mathbf{r}, \mathbf{v}, s = 0))] \quad (5)$$

For ease of computation, Chen et al. [1] assume that  $\mathbf{r}$  is given (via a recombination map) and we will do so too. Furthermore, they empirically estimate  $\mathbf{v}$  using  $F_2$  statistics [18] calculated over the whole genome, and assume selection is not strong or frequent enough to affect their genome-wide values. Because we are interested in selection over long time scales, the new methods we will present below are optimally run using drift times calculated from population split times and effective population sizes estimated using model-based demographic inference methods, like  $\partial a \partial i$  [19] or fastsimcoal2 [20].

### 3.2 3P-CLR

We are interested in the case where a selective event occurred more anciently than the split of two populations ( $a$  and  $b$ ) from each other, but more recently than their split from a third population  $c$  (Figure 1.B). We begin by modeling  $p_A$  and  $p_B$  as evolving from an unknown common ancestral frequency  $\beta$ :

$$p_A | \beta, \omega \sim N(\beta, \omega \beta(1 - \beta)) \quad (6)$$

$$p_B | \beta, \psi \sim N(\beta, \psi \beta(1 - \beta)) \quad (7)$$

Let  $\chi$  be the drift time separating the most recent common ancestor of  $a$  and  $b$  from the most recent common ancestor of  $a$ ,  $b$  and  $c$ . Additionally, let  $\nu$  be the drift time separating population  $c$  in the present from the most recent common ancestor of  $a$ ,  $b$  and  $c$ . Given these parameters, we can treat  $\beta$  as an additional random variable that either evolves neutrally or is linked to a selected allele that swept immediately more anciently than the split of  $a$  and  $b$ . In both cases, the distribution of  $\beta$  will depend on the frequency of the allele in population  $c$  ( $p_C$ ) in the present. In the neutral case:

$$f_{neut}(\beta | p_C, \nu, \chi) = N(p_C, (\nu + \chi)p_C(1 - p_C)) \quad (8)$$

In the linked selection case:

$$f_{sel}(\beta | p_C, \nu, \chi, r, s) = \frac{1}{\sqrt{2\pi\kappa}} \frac{\beta + c - 1}{c^2} e^{-\frac{(\beta + c - 1 - cp_C)^2}{2c^2\kappa^2}} I_{[1-c, 1]}(\beta) + \frac{1}{\sqrt{2\pi\kappa}} \frac{c - \beta}{c^2} e^{-\frac{(\beta - cp_C)^2}{2c^2\kappa^2}} I_{[0, c]}(\beta) \quad (9)$$

where  $\kappa^2 = (\nu + \chi)p_C(1 - p_C)$

The frequencies in  $a$  and  $b$  given the frequency in  $c$  can be obtained by integrating  $\beta$  out. This leads

121 to a density function that models selection in the ancestral population of  $a$  and  $b$ .

$$f(p_A, p_B | p_C, \mathbf{v}, r, s) = \int_0^1 f_{neut}(p_A | \beta, \omega) f_{neut}(p_B | \beta, \psi) f_{sel}(\beta | p_C, \nu, \chi, r, s) d\beta \quad (10)$$

122 Additionally, formula 10 can be modified to test for selection that occurred specifically in one of the  
123 terminal branches that lead to  $a$  or  $b$  (Figures 1.C and 1.D), rather than in the ancestral population of  $a$   
124 and  $b$ . For example, the density of frequencies for a scenario of selection in the branch leading to  $a$  can  
125 be written as:

$$f(p_A, p_B | p_C, \mathbf{v}, r, s) = \int_0^1 f_{sel}(p_A | \beta, \omega, r, s) f_{neut}(p_B | \beta, \psi) f_{neut}(\beta | p_C, \nu, \chi) d\beta \quad (11)$$

126 We will henceforth refer to the version of 3P-CLR that is tailored to detect selection in the internal  
127 branch that is ancestral to  $a$  and  $b$  as 3P-CLR(Int). In turn, the versions of 3P-CLR that are designed  
128 to detect selection in each of the daughter populations  $a$  and  $b$  will be designated as 3P-CLR(A) and  
129 3P-CLR(B), respectively.

130 We can now calculate the probability density of specific allele frequencies in populations  $a$  and  $b$ , given  
131 that we observe  $m_C$  derived alleles in a sample of size  $n_C$  from population  $c$ :

$$f(p_A, p_B | m_C, \mathbf{v}, r, s) = \int_0^1 f(p_A, p_B | p_C, \mathbf{v}, r, s) f(p_C | m_C) dp_C \quad (12)$$

132 and

$$f(p_C | m_C) = \frac{1}{B(m_C, n_C - m_C + 1)} p_C^{m_C - 1} (1 - p_C)^{n_C - m_C} \quad (13)$$

133 where  $B(x, y)$  is the Beta function.

134 Conditioning on the event that the site is segregating in the population, we can then calculate the  
135 probability of observing  $m_A$  and  $m_B$  derived alleles in a sample of size  $n_A$  from population  $a$  and a sample  
136 of size  $n_B$  from population  $b$ , respectively, given that we observe  $m_C$  derived alleles in a sample of size  
137  $n_C$  from population  $c$ , using binomial sampling:

$$P(m_A, m_B | m_C, \mathbf{v}, r, s) = \frac{\int_0^1 \int_0^1 P(m_A | p_A) P(m_B | p_B) f(p_A, p_B | m_C, \mathbf{v}, r, s) dp_A dp_B}{\int_0^1 \int_0^1 f(p_A, p_B | m_C, \mathbf{v}, r, s) dp_A dp_B} \quad (14)$$

138 where

$$P(m_A|p_A) = \binom{n_A}{m_A} p_A^{m_A} (1 - p_A)^{n_A - m_A} \quad (15)$$

139 and

$$P(m_B|p_B) = \binom{n_B}{m_B} p_B^{m_B} (1 - p_B)^{n_B - m_B} \quad (16)$$

140 This allows us to calculate a composite likelihood of the derived allele counts in  $a$  and  $b$  given the  
141 derived allele counts in  $c$ :

$$CL_{3P-CLR}(\mathbf{r}, \mathbf{v}, s) = \prod_{j=1}^k P(m_A^j, m_B^j | m_C^j, \mathbf{v}, r^j, s) \quad (17)$$

142 As before, we can use this composite likelihood to produce a composite likelihood ratio statistic  
143 that can be calculated over regions of the genome to test the hypothesis of linked selection centered on a  
144 particular locus against the hypothesis of neutrality. Due to computational costs in numerical integration,  
145 we skip the sampling step for population  $c$  (formula 13) in our implementation of 3P-CLR. In other  
146 words, we assume  $p_C = m_C/n_C$ , but this is also assumed in XP-CLR when computing its corresponding  
147 outgroup frequency. To perform the numerical integrations, we used the package Cubature (v.1.0.2). We  
148 implemented our method in a freely available C++ program that can be downloaded from here:

149 <https://github.com/ferracimo> [WILL POST IT AFTER PUBLICATION]

## 150 4 Results

### 151 4.1 Simulations

152 We generated simulations in SLiM [21] to test the performance of XP-CLR and 3P-CLR in a three-  
153 population scenario. We first focused on the performance of 3P-CLR(Int) in detecting ancient selective  
154 events that occurred in the ancestral branch of two sister populations. We assumed that the population  
155 history had been correctly estimated by the researcher (i.e. the drift parameters and population topology  
156 were known). First, we simulated scenarios in which a beneficial mutation arose in the ancestor of  
157 populations  $a$  and  $b$ , before their split from each other but after their split from  $c$  (Table 1). Although

both XP-CLR and 3P-CLR are sensitive to partial or soft sweeps (as they do not rely on extended patterns of haplotype homozygosity [1]), we required the allele to have fixed before the split (at time  $t_{ab}$ ) to ensure that the allele had not been lost before it, and also to ensure that the sweep was restricted to the internal branch of the tree. We fixed the effective size of all three populations at  $N_e = 10,000$ . Each simulation consisted in a 5 cM region and the beneficial mutation occurred in the center of this region. The mutation rate was set at  $2.5 * 10^{-8}$  per generation and the recombination rate was set at  $10^{-8}$  per generation.

To make a fair comparison to 3P-CLR(Int), and given that XP-CLR is a two-population test, we applied XP-CLR in two ways. First, we pretended population  $b$  was not sampled, and so the "test" panel consisted of individuals from  $a$  only, while the "outgroup" consisted of individuals from  $c$ . In the second implementation (which we call "XP-CLR-avg"), we used the same outgroup panel, but pooled the individuals from  $a$  and  $b$  into a single panel, and this pooled panel was the "test". The window size was set at 0.5 cM and the space between the center of each window was set at 600 SNPs. To speed up computation, and because we are largely interested in comparing the relative performance of the three tests under different scenarios, we used only 20 randomly chosen SNPs per window in all tests. We note, however, that the performance of all three tests can be improved by using more SNPs per window.

Figure 2 shows receiver operating characteristic (ROC) curves comparing the sensitivity and specificity of 3P-CLR(Int), 3P-CLR(A), XP-CLR and XP-CLR-avg in the first six demographic scenarios described in Table 1. Each ROC curve was made from 100 simulations under selection (with  $s = 0.1$  for the central mutation) and 100 simulations under neutrality (with  $s = 0$  and no fixation required). In each simulation, 100 haploid individuals (or 50 diploids) were sampled from population  $a$ , 100 individuals from population  $b$  and 100 individuals from the outgroup population  $c$ . For each simulation, we took the maximum value at a region in the neighborhood of the central mutation ( $\pm 0.5$  cM) and used those values to compute ROC curves under the two models.

When the split times are recent or moderately ancient (models A to D), 3P-CLR(Int) outperforms the two versions of XP-CLR. Furthermore, 3P-CLR(A) is the test that is least sensitive to selection in the internal branch as it is only meant to detect selection in the terminal branch leading to population  $a$ . When the split times are very ancient (models E and F), none of the tests perform well. The root mean squared error (RMSE) of the genetic distance between the true selected site and the highest scored window is comparable across tests in all six scenarios (Figure S2). 3P-CLR(Int) is the best test at finding



the true location of the selected site in almost all demographic scenarios.

We also simulated a situation in which only a few individuals (e.g. a small sample of archaic humans) have been sequenced from the outgroup, while large numbers of sequences are available from the tests (e.g. two populations of present-day humans). Figures S1 and S3 show the ROC curves and RMSE plots, respectively, for a scenario in which 100 individuals were sampled from the test populations but only 10 individuals (5 diploids) were sampled from the outgroup. Unsurprisingly, all tests have less power to detect selection when the split times and the selection events are recent to moderately ancient (models A-D). Interestingly though, when the split times and the selective events are very ancient (models E-F), both 3P-CLR and XP-CLR perform better when using a small outgroup panel (Figure S1) than when using a large outgroup panel (Figure 2). This may be because both of these tests require the outgroup sample at each site to be a segregating polymorphism, and sites that are polymorphic in a small panel are, on average, more ancient than sites that are polymorphic in a large panel. Because the recent polymorphisms in the outgroup carry little or no information about ancient selection in the tests, they are less likely to contribute to differences in the likelihood functions for the selection and the neutrality models, and so they make these tests less efficient at distinguishing these two models.

Importantly, the usefulness of 3P-CLR(Int) resides not just in its performance at detecting selective sweeps in the ancestral population, but in its specific sensitivity to that particular type of events. Because the test relies on correlated allele frequency differences in both population *a* and population *b* (relative to the outgroup), selective sweeps that are specific to only one of the populations will not lead to high 3P-CLR(Int) scores, but will instead lead to high 3P-CLR(A) scores or 3P-CLR(B) scores, depending on where selection took place. Figure 3 shows ROC curves in two scenarios in which a selective sweep event occurred only in population *a* (models I and J in Table 1), using 100 sampled individuals from each of the 3 populations. Here, XP-CLR performs well, but is outperformed by 3P-CLR(A). Furthermore, 3P-CLR(Int) shows almost no sensitivity to the recent sweep. For example, in Model I, at a specificity of 90%, 3P-CLR(A) and XP-CLR(A) have 86% and 80% sensitivity, respectively, while at the same specificity, 3P-CLR(Int) only has 18% sensitivity. One can compare this to the same demographic scenario but with selection occurring in the ancestral population of *a* and *b* (model C, Figure 2), where at 90% specificity, 3P-CLR(A) and XP-CLR(A) have 72% and 84% sensitivity, respectively, while 3P-CLR(Int) has 90% sensitivity. We also observe that 3P-CLR(A) is the best test at finding the true location of the selected site when selection occurs in the terminal branch leading to population *a* (Figure S4).

## 218 4.2 Selection in Eurasians

219 We first applied 3P-CLR to modern human data from the 1000 Genomes Project [12]. We used the  
220 African-American recombination map [22] to convert physical distances into genetic distances. We fo-  
221 cused on Europeans and East Asians as the two sister populations, using Africans (excluding admixed  
222 African-Americans) as the outgroup population (Figure S5.A). We randomly sampled 100 individuals  
223 from each population and obtained sample derived allele frequencies every 10 SNPs in the genome. We  
224 then calculated likelihood ratio statistics by a sliding window approach, where we sampled a "central  
225 SNP" once every 20 SNPs. The central SNP in each window was the candidate beneficial SNP for that  
226 window. We set the window size to 0.25 cM, and randomly sampled 100 SNPs from each window, cen-  
227 tered around the candidate beneficial SNP. In each window, we calculated 3P-CLR to test for selection  
228 at three different branches of the population tree: the terminal branch leading to Europeans (3P-CLR  
229 Europe), the terminal branch leading to East Asians (3P-CLR East Asia) and the ancestral branch of  
230 Europeans and East Asians (3P-CLR Eurasia). Results are shown in Figure 4. For each scan, we selected  
231 the windows in the top 99.9% quantile of scores and merged them together if they were contiguous. Tables  
232 2, 3 and 4 show the top hits for Europeans, East Asians and the ancestral Eurasian branch, respectively

233 We observe several genes that have been identified in previous selection scans. In the East Asian  
234 branch, one of the top hits is *EDAR*. This gene codes for a protein involved in hair thickness and incisor  
235 tooth morphology [23,24]. It has been repeatedly identified in earlier selections scans as having undergone  
236 a sweep in East Asians [25,26].

237 Furthermore, 3P-CLR allows us to narrow down on the specific time at which selection occurred in  
238 the history of particular populations. For example, ref. [1] performed a scan of the genomes of East  
239 Asians using XP-CLR with Africans as the outgroup, and identified a number of genes as being under  
240 selection [1]. 3P-CLR confirms this signal in several of these loci when looking specifically at the East  
241 Asian branch: *CYP26B1*, *EMX1*, *SPR*, *SFXN5*, *PPARA*, *PKDREJ*, *GTSE1*, *TRMU*, *CELSR1*, *PINX1*,  
242 *XKR6*, *CD226*, *ACD*, *PARD6A*, *GFOD2*, *RANBP10*, *TSNAXIP1*, *CENPT*, *THAP11*, *NUTF2*, *CDH16*,  
243 *RRAD*, *FAM96B*, *CES2*, *CBFB*, *C16orf70*, *TRADD*, *FBXL8*, *HSF4*, *NOL3*, *EXOC3L1*, *E2F4*, *ELMO3*,  
244 *LRRC29*, *FHOD1*, *SLC9A5*, *PLEKHG4*, *LRRC36*, *ZDHHC1*, *HSD11B2*, *ATP6V0D1*, *AGRP*, *FAM65A*,  
245 *CTCF* and *RLTPR*. However, when applied to the ancestral Eurasian branch, 3P-CLR finds some genes  
246 that were previously found in the XP-CLR analysis of East Asians, but that are not among the top hits  
247 in 3P-CLR applied to the East Asian branch: *COMMD3*, *BMI1*, *SPAG6* and *ABCC12*. This suggests

selection in these regions occurred earlier, i.e. before the European-East Asian split. Figure 5.A shows a comparison between the 3P-CLR scores for the three branches in the region containing genes *BMI1* (a proto-oncogene [27]) and *SPAG6* (involved in sperm motility [28]). In that figure, the score within each window was standardized using its chromosome-wide mean and standard deviation, to make a fair comparison. One can observe that the signal of Eurasia-specific selection is evidently stronger than the other two signals.

When running 3P-CLR to look for selection specific to Europe, we find that *TYRP1* (Figure 5.B) and *MYO5A*, which play a role in human skin pigmentation [29–32], are among the top hits. Both of these genes have been previously found to be under strong selection in Europe [33], using a statistic called iHS, which measures extended patterns of haplotype homozygosity that are characteristic of selective sweeps. Interestingly, a change in the gene *TYRP1* has also been found to cause a blonde hair phenotype in Melanians [34]. Another of our top hits is the region containing *SH2B3*, which was identified previously as a candidate for selection in Europe based on both iHS and Fst [35]. This gene contains a nonsynonymous SNP (rs3184504) segregating in Europeans. One of its alleles (the one in the selected haplotype) has been associated with celiac disease and type 1 diabetes [36, 37] but is also protective against bacterial infection [38].

We used Gowinda (v1.12) [39] to find enriched Gene Ontology (GO) categories among the regions in the 99% highest quantile for each branch score, relative to the rest of the genome ( $P < 0.05$ , FDR  $< 0.2$ ). The significantly enriched categories are listed in Table 5. In the East Asian branch, we find categories related to pyruvate metabolism, cholesterol absorption and peroxisome proliferation. In the European branch, we find categories related to cuticle development, antioxidant activity and thyroid hormone generation, among others. In the Eurasian branch, we only find two categories that are related to the regulation of transcription by sequence-specific DNA-binding.

### 4.3 Selection in ancestral modern humans

We applied 3P-CLR to modern human data combined with recently sequenced archaic human data [10]. We sought to find selective events that occurred in modern humans after their split from archaic groups. We used the combined Neanderthal and Denisovan high-coverage genomes [9, 10] as the outgroup population, and, for our two test populations, we randomly sampled 100 Eurasian genomes and 100 African genomes (excluding admixed African-Americans) from the 1000 Genomes data (Figure S5.B).

We used previously estimated drift times as fixed parameters [10], and tested for selective events that occurred more anciently than the split of Africans and Eurasians, but more recently than the split from Neanderthals. We ran 3P-CLR using 0.25 cM windows as above, but also verified that the density of scores was robust to the choice of window size and spacing (Figure S6). As before, we selected the top 99.9% windows and merged them together if they were contiguous. Table 6 and Figure S7 show the top hits. To find putative candidates for the beneficial variants in each region, we queried the catalogs of modern human-specific high-frequency or fixed derived changes that are ancestral in the Neanderthal and/or the Denisova genomes [10, 40].

We observe several genes that have been identified in previous scans that looked for selection in modern humans after their split from archaic groups [8, 10]: *SIPA1L1*, *ANAPC10*, *ABCE1*, *RASA1*, *CCNH*, *KCNJ3*, *HBP1*, *COG5*, *GPR22*, *DUS4L*, *BCAP29*, *CADPS2*, *RNF133*, *RNF148*, *FAM172A*, *POU5F2*, *FGF7*, *RABGAP1*, *GPR21*, *STRBP*, *SMURF1*, *GABRA2*, *ALMS1*, *PVRL3*, *EHBP1*, *VPS54*, *OTX1*, *UGP2*, *HCN1*, *GTDC1*, *ZEB2*, *OIT3*, *USP54* and *MYOZ1*. One of our strongest candidate genes among these is *ANAPC10*. This gene is a core subunit of the cyclosome, is involved in progression through the cell cycle [41], and may play a role in oocyte maturation and human T-lymphotropic virus infection (KEGG pathway [42]). *ANAPC10* is noteworthy because it was found to be significantly differentially expressed in humans compared to other great apes and macaques: it is up-regulated in the testes [43]. The gene also contains two intronic changes that are fixed derived in modern humans, ancestral in both Neanderthals and Denisovans and that have evidence for being highly disruptive, based on a composite score that combines conservation and regulatory data (PHRED-scaled C-scores > 11 [10, 44]). The changes, however, appear not to lie in any obvious regulatory region [45, 46].

We also find *ADSL* among the list of candidates. This gene is known to contain a nonsynonymous change that is fixed in all present-day humans but homozygous ancestral in the Neanderthal genome, the Denisova genome and two Neanderthal exomes [40] (Figure 6.A). It was previously identified as lying in a region with strong support for positive selection in modern humans, using summary statistics implemented in an ABC method [11]. The gene is interesting because it is one of the members of the Human Phenotype ontology category "aggression / hyperactivity" which is enriched for nonsynonymous changes that occurred in the modern human lineage after the split from archaic humans [40, 47]. *ADSL* codes for adenylosuccinase, an enzyme involved in purine metabolism [48]. A deficiency of adenylosuccinase can lead to apraxia, speech deficits, delays in development and abnormal behavioral features, like

hyperactivity and excessive laughter [49]. The nonsynonymous mutation (A429V) is in the C-terminal domain of the protein (Figure 6.B) and lies in a highly conserved position (primate PhastCons = 0.953; GERP score = 5.67 [44, 50, 51]). The ancestral amino acid is conserved across the tetrapod phylogeny, and the mutation is only three residues away from the most common causative SNP for severe adenylosuccinase deficiency [52–56]. The change has the highest probability of being disruptive to protein function, out of all the nonsynonymous modern-human-specific changes that lie in the top-scoring regions (C-score = 17.69). While *ADSL* is an interesting candidate and lies in the center of the inferred selected region (Figure 6.A), there are other genes in the region too, including *TNRC6B* and *MKL1*. *TNRC6B* may be involved in miRNA-guided gene silencing [57], while *MKL1* may play a role in smooth muscle differentiation [58], and has been associated with acute megakaryocytic leukemia [59].

*RASA1* was also a top hit in a previous scan for selection [8], and was additionally inferred to have a high Bayes factor in favor of selection in ref. [11]. The gene codes for a protein involved in the control of cellular differentiation [60], and has a modern human-specific fixed nonsynonymous change (G70E). Human diseases associated with *RASA1* include basal cell carcinoma [61] and arteriovenous malformation [62, 63].

The *GABA<sub>A</sub>* gene cluster in chromosome 4p12 is also among the top regions. The genes within the putatively selected region code for three of the subunits of the *GABA<sub>A</sub>* receptor (*GABRA2*, *GABRA4*), which codes for a ligand-gated ion channel that plays a key role in synaptic inhibition in the central nervous system (see review by ref. [64]). *GABRA2* is significantly associated with the risk of alcohol dependence in humans [65], perception of pain [66] and asthma [67]. In turn, *GABRA4* is associated with autism risk [68, 69].

Two other candidate genes that may be involved in brain development are *FOXP1* and *CADPS2*. *FOXP1* was not identified in any of the previous selection scans, and codes for a protein called forkhead box G1, which plays an important role during brain development. Mutations in this gene have been associated with a slow-down in brain growth during childhood resulting in microcephaly, which in turn causes various intellectual disabilities [70, 71]. *CADPS2* was identified in [8] as a candidate for selection, and has been associated with autism [72]. The gene has been suggested to be specifically important in the evolution of all modern humans, as it was not found to be selected earlier in great apes or later in particular modern human populations [73].

Finally, we find a signal of selection in a region containing the gene *EHBP1* and *OTX1*. This region

was identified in both of the two previous scans for modern human selection [8,10]. *EHBP1* codes for a protein involved in endocytic trafficking [74] and has been associated with prostate cancer [75]. *OTX1* is a homeobox family gene that may play a role in brain development [76]. Interestingly, *EHBP1* contains a single-nucleotide intronic change (chr2:63206488) that is almost fixed in all present-day humans and homozygous ancestral in Neanderthal and Denisova [10]. This change is also predicted to be highly disruptive (C-score = 13.1) and lies in a position that is extremely conserved across primates (PhastCons = 0.942), mammals (PhastCons = 1) and vertebrates (PhastCons = 1). The change is 18 bp away from the nearest splice site and overlaps a VISTA conserved enhancer region (element 1874) [77], which suggests a putative regulatory role for the change.

We again used Gowinda [39] to find enriched GO categories among the regions with high 3P-CLR scores in the Modern Human branch. This time, we used a stricter quantile cutoff (99.5%) to define candidate regions than we did when running the program in the Eurasian tree (99%) because the less strict cutoff yielded a very large number of enriched categories (114), though in both cases the enriched terms were very similar. The significantly enriched categories ( $P < 0.05$ ,  $FDR < 0.2$ ) are listed in Table 7. We find several GO terms related to the regulation of the cell cycle, cell proliferation in the bone marrow, lymphocyte chemotaxis and myeloid cell differentiation.

#### 4.4 Modern human-specific high-frequency changes in GWAS catalog

We overlapped the genome-wide association studies (GWAS) database [78,79] with the list of fixed or high-frequency modern human-specific changes that are ancestral in archaic humans [10] and that are located within our top putatively selected regions in modern humans (Table 8). None of the resulting SNPs are completely fixed derived, because GWAS can only yield associations from sites that are segregating. Among these SNPs, the one with the highest probability of being disruptive (rs10003958, C-score = 16.58, Gerp score = 6.07) is located in a highly-conserved regulatory ("strong enhancer") region in the *RAB28* gene [45,46] (Primate PhastCons = 0.951), and is significantly associated with obesity [80] (Figure 7.A). Interestingly, the region containing *RAB28* is inferred to have been under positive selection in both the modern human and the Eurasian ancestral branches (Tables 4, 6). In line with this evidence, the derived allele of rs10003958 is absent in archaic humans, at very high frequencies in Eurasians ( $> 94\%$ ), and only at moderately high frequencies in Africans (74%) (Figure 7.B).

We also find a highly disruptive SNP (rs10171434, C-score = 8.358) associated with urinary metabo-

lites [81] and suicidal behavior in patients with mood disorders [82]. The SNP is located in an enhancer regulatory feature [45, 46] located between genes *PELI1* and *VPS54*, in the same putatively selected region as genes *EHBP1* and *OTX1* (see above). Finally, there is a highly disruptive SNP (rs731108, C-score = 10.31) that is associated with renal cell carcinoma [83]. This SNP is also located in an enhancer regulatory feature [45, 46], in an intron of *ZEB2*. In this last case, though, only the Neanderthal genome has the ancestral state, while the Denisova genome carries the modern human variant.

## 5 Discussion

We have developed a new method called 3P-CLR, which allows us to detect positive selection along the genome. The method is based on an earlier test (XP-CLR [1]) that uses linked allele frequency differences between two populations to detect population-specific selection. However, 3P-CLR can allow us to distinguish between selective events that occurred before and after the split of two populations. Our method also has some similarities to an earlier method developed by [84], which used an  $F_{st}$ -like score to detect selection ancestral to two populations. In that case, though, the authors used summary statistics and did not explicitly model the process leading to allele frequency differentiation.

We used our method to confirm previously found candidate genes in particular human populations, like *EDAR*, *TYRP1*, *SH2B3* and *MYO5A*, and find some novel candidates too (Tables 2, 3, 4). Additionally, we can infer that certain genes, which were previously known to have been under selection in East Asians (like *SPAG6*), are more likely to have undergone a sweep in the population ancestral to both Europeans and East Asians than in East Asians only. We find that genes involved in pyruvate and cholesterol metabolism are particularly enriched among the East Asian candidate regions, which suggests these biological functions may have been subject to positive selection in recent times.

We also used 3P-CLR to detect selective events that occurred in the ancestors of modern humans, after their split from Neanderthals and Denisovans (Table 6). These events could perhaps have led to the spread of phenotypes that set modern humans apart from other hominin groups. We find several interesting candidates, like *SIPA1L1*, *ADSL*, *RASA1*, *OTX1*, *EHBP1*, *FOXG1*, *RAB28* and *ANAPC10*, some of which were previously detected using other types of methods [8, 10, 11]. We also find an enrichment for GO categories related to cell cycle regulation and lymphocyte chemotaxis among the candidate regions, suggesting that these biological processes might have been affected by positive selection after the split



394 from archaic humans.

395 An advantage of differentiation-based tests like XP-CLR and 3P-CLR is that, unlike other patterns  
396 detected by tests of neutrality (like extended haplotype homozygosity, [85]) that are exclusive to hard  
397 sweeps, the patterns that both XP-CLR and 3P-CLR are tailored to find are based on regional allele  
398 frequency differences between populations. These patterns can also be produced by soft sweeps from  
399 standing variation or by partial sweeps [1], and there is some evidence that the latter phenomena may  
400 have been more important than classic sweeps during human evolutionary history [86].

401 Another advantage of both XP-CLR and 3P-CLR is that they do not rely on an arbitrary division  
402 of genomic space. Unlike other methods which require the partition of the genome into small windows  
403 of fixed size, our composite likelihood ratios can theoretically be computed over windows that are as big  
404 as each chromosome, while only switching the central candidate site at each window. This is because  
405 the likelihood ratios use the genetic distance to the central SNP as input. SNPs that are very far away  
406 from the central SNP will not contribute much to the likelihood function of both the neutral and the  
407 selection models, while those that are close to it will. While we heuristically limit the window size in  
408 our implementation in the interest of speed, this can be arbitrarily adjusted by the user as needed.  
409 The use of genetic distance in the likelihood function also allows us to take advantage of the spatial  
410 distribution of SNPs as an additional source of information, rather than only relying on patterns of  
411 population differentiation restricted to tightly linked SNPs.

412 3P-CLR also has an advantage over HMM-based selection methods, like the one implemented in  
413 ref. [10]. The likelihood ratio scores obtained from 3P-CLR can provide an idea of how credible a  
414 selection model is for a particular region, relative to the rest of the genome. The HMM-based method  
415 previously used to scan for selection in modern humans [10] can only rank putatively selected regions by  
416 genetic distance, but cannot output a statistical measure that may indicate how likely each region is to  
417 have been selected in ancient times. In contrast, 3P-CLR provides a composite likelihood ratio score,  
418 which allows for a statistically rigorous way to compare the neutral model and a specific selection model  
419 (for example, recent or ancient selection).

420 The score also gives an idea of how much fainter the signal of ancient selection in modern humans  
421 is, relative to recent selection specific to a particular present-day population. For example, the outliers  
422 from Figure 4 have much higher scores (relative to the rest of the genome) than the outliers from Figure  
423 S7. This may be due to both the difference in time scales in the two sets of tests and to the uncertainty



that comes from estimating outgroup allele frequencies using only two archaic genomes. This pattern can also be observed in Figure S8, where the densities of the scores looking for patterns of ancient selection (3P-CLR Modern Human and 3P-CLR Eurasia) have much shorter tails than the densities of scores looking for patterns of recent selection (3P-CLR Europe and 3P-CLR East Asia). Simulations show that 3P-CLR(Int) score distributions are naturally shorter than 3P-CLR(A) scores (Figure S9), which could explain the short tail of the 3P-CLR Eurasia distribution. Additionally, the even shorter tail in the distribution of 3P-CLR Modern Human scores may be a consequence of the fact that the split times of the demographic history in that case are older than the split times in the Eurasian tree, as simulations show that ancient split times tend to further shorten the tail of the 3P-CLR score distribution (Figure S9).

A limitation of composite likelihood ratio tests is that the composite likelihood calculated for each model under comparison is obtained from a product of individual likelihoods at each site, and so it underestimates the correlation that exists between SNPs due to linkage effects [1, 16, 17, 87]. One way to mitigate this problem is by using corrective weights based on linkage disequilibrium (LD) statistics calculated on the outgroup population [1]. Our implementation of 3P-CLR allows the user to incorporate such weights, if appropriate LD statistics are available from the outgroup. However, in cases where these are unreliable, it may not be possible to fully correct for this (for example, when only a few unphased genomes are available, as in the case of the Neanderthal and Denisova genomes).

While 3P-CLR relies on integrating over the possible allele frequencies in the ancestors of populations  $a$  and  $b$  (formula 10), one could envision using ancient DNA to avoid this step. Thus, if enough genomes could be sampled from that ancestral population that existed in the past, one could use the sample frequency in the ancient set of genomes as a proxy for the ancestral population frequency. This may soon be possible, as several early modern human genomes have already been sequenced in recent years [88–90].

Though we have limited ourselves to a three-population model in this manuscript, it should be straightforward to expand our model to a larger number of populations, albeit with additional costs in terms of speed and memory. Our method relies on a similar framework to the demographic inference method implemented in TreeMix [91], which can estimate complex population trees that include migration events, using genome-wide data. With a more complex modeling framework, it may be possible to estimate the time and strength of selective events with better resolution, and to incorporate additional demographic forces, like continuous migration between populations or pulses of admixture.

## 454 Acknowledgments

455 We thank Montgomery Slatkin, Rasmus Nielsen, Joshua Schraiber, Nicolas Duforet-Frebourg, Emilia  
456 Huerta-Sánchez, Hua Chen, Nick Patterson, David Reich, Joachim Hermisson, Graham Coop and mem-  
457 bers of the Slatkin and Nielsen labs for helpful advice and discussions. This work was supported by NIH  
458 grant R01-GM40282 to Montgomery Slatkin.

## 459 References

- 460 1. Chen H, Patterson N, Reich D (2010) Population differentiation as a test for selective sweeps.  
461 Genome research 20: 393–402.
- 462 2. Smith JM, Haigh J (1974) The hitch-hiking effect of a favourable gene. Genetical research 23:  
463 23–35.
- 464 3. Lewontin R, Krakauer J (1973) Distribution of gene frequency as a test of the theory of the selective  
465 neutrality of polymorphisms. Genetics 74: 175–195.
- 466 4. Akey JM, Zhang G, Zhang K, Jin L, Shriver MD (2002) Interrogating a high-density snp map for  
467 signatures of natural selection. Genome research 12: 1805–1814.
- 468 5. Weir BS, Cardon LR, Anderson AD, Nielsen DM, Hill WG (2005) Measures of human population  
469 structure show heterogeneity among genomic regions. Genome research 15: 1468–1476.
- 470 6. Oleksyk TK, Zhao K, Francisco M, Gilbert DA, O’Brien SJ, et al. (2008) Identifying selected  
471 regions from heterozygosity and divergence using a light-coverage genomic dataset from two human  
472 populations. PLoS One 3: e1712.
- 473 7. Yi X, Liang Y, Huerta-Sanchez E, Jin X, Cuo ZXP, et al. (2010) Sequencing of 50 human exomes  
474 reveals adaptation to high altitude. Science 329: 75–78.
- 475 8. Green RE, Krause J, Briggs AW, Maricic T, Stenzel U, et al. (2010) A draft sequence of the  
476 neandertal genome. science 328: 710–722.
- 477 9. Meyer M, Kircher M, Gansauge MT, Li H, Racimo F, et al. (2012) A high-coverage genome sequence  
478 from an archaic denisovan individual. Science 338: 222–226.

- 479 10. Prüfer K, Racimo F, Patterson N, Jay F, Sankararaman S, et al. (2014) The complete genome  
480 sequence of a neanderthal from the altai mountains. *Nature* 505: 43–49.
- 481 11. Racimo F, Kuhlwillm M, Slatkin M (2014) A test for ancient selective sweeps and an application  
482 to candidate sites in modern humans. *Molecular biology and evolution* 31: 3344–3358.
- 483 12. Consortium GP, et al. (2012) An integrated map of genetic variation from 1,092 human genomes.  
484 *Nature* 491: 56–65.
- 485 13. Nicholson G, Smith AV, Jónsson F, Gústafsson Ó, Stefánsson K, et al. (2002) Assessing popula-  
486 tion differentiation and isolation from single-nucleotide polymorphism data. *Journal of the Royal*  
487 *Statistical Society: Series B (Statistical Methodology)* 64: 695–715.
- 488 14. Durrett R, Schweinsberg J (2004) Approximating selective sweeps. *Theoretical population biology*  
489 66: 129–138.
- 490 15. Fay JC, Wu CI (2000) Hitchhiking under positive darwinian selection. *Genetics* 155: 1405–1413.
- 491 16. Lindsay BG (1988) Composite likelihood methods. *Contemporary Mathematics* 80: 221–39.
- 492 17. Varin C, Reid N, Firth D (2011) An overview of composite likelihood methods. *Statistica Sinica*  
493 21: 5–42.
- 494 18. Patterson N, Moorjani P, Luo Y, Mallick S, Rohland N, et al. (2012) Ancient admixture in human  
495 history. *Genetics* 192: 1065–1093.
- 496 19. Gutenkunst RN, Hernandez RD, Williamson SH, Bustamante CD (2009) Inferring the joint demo-  
497 graphic history of multiple populations from multidimensional snp frequency data. *PLoS genetics*  
498 5: e1000695.
- 499 20. Excoffier L, Dupanloup I, Huerta-Sánchez E, Sousa VC, Foll M (2013) Robust demographic infer-  
500 ence from genomic and snp data. *PLoS genetics* 9: e1003905.
- 501 21. Messer PW (2013) Slim: simulating evolution with selection and linkage. *Genetics* 194: 1037–1039.
- 502 22. Hinch AG, Tandon A, Patterson N, Song Y, Rohland N, et al. (2011) The landscape of recombina-  
503 tion in african americans. *Nature* 476: 170–175.

- 504 23. Fujimoto A, Kimura R, Ohashi J, Omi K, Yuliwulandari R, et al. (2008) A scan for genetic  
505 determinants of human hair morphology: Edar is associated with asian hair thickness. Human  
506 Molecular Genetics 17: 835–843.
- 507 24. Kimura R, Yamaguchi T, Takeda M, Kondo O, Toma T, et al. (2009) A common variation in edar  
508 is a genetic determinant of shovel-shaped incisors. The American Journal of Human Genetics 85:  
509 528–535.
- 510 25. Sabeti PC, Varilly P, Fry B, Lohmueller J, Hostetter E, et al. (2007) Genome-wide detection and  
511 characterization of positive selection in human populations. Nature 449: 913–918.
- 512 26. Grossman SR, Shylakhter I, Karlsson EK, Byrne EH, Morales S, et al. (2010) A composite of  
513 multiple signals distinguishes causal variants in regions of positive selection. Science 327: 883–  
514 886.
- 515 27. Siddique HR, Saleem M (2012) Role of bmi1, a stem cell factor, in cancer recurrence and chemore-  
516 sistance: preclinical and clinical evidences. Stem Cells 30: 372–378.
- 517 28. Sapiro R, Kostetskii I, Olds-Clarke P, Gerton GL, Radice GL, et al. (2002) Male infertility, impaired  
518 sperm motility, and hydrocephalus in mice deficient in sperm-associated antigen 6. Molecular and  
519 cellular biology 22: 6298–6305.
- 520 29. Pastural E, Ersoy F, Yalman N, Wulffraat N, Grillo E, et al. (2000) Two genes are responsible for  
521 griscelli syndrome at the same 15q21 locus. Genomics 63: 299–306.
- 522 30. Fukuda M, Kuroda T, Mikoshiba K (2002) Slac2-a/melanophilin, the missing link between rab27  
523 and myosin va: implications of a tripartite protein complex for melanosome transport. The Journal  
524 of biological chemistry 277: 12432.
- 525 31. Halaban R, Moellmann G (1990) Murine and human b locus pigmentation genes encode a gly-  
526 coprotein (gp75) with catalase activity. Proceedings of the National Academy of Sciences 87:  
527 4809–4813.
- 528 32. Sulem P, Gudbjartsson DF, Stacey SN, Helgason A, Rafnar T, et al. (2008) Two newly identified  
529 genetic determinants of pigmentation in europeans. Nature genetics 40: 835–837.

- 530 33. Voight BF, Kudaravalli S, Wen X, Pritchard JK (2006) A map of recent positive selection in the  
531 human genome. *PLoS biology* 4: e72.
- 532 34. Kenny EE, Timpson NJ, Sikora M, Yee MC, Moreno-Estrada A, et al. (2012) Melanesian blond  
533 hair is caused by an amino acid change in *tyrp1*. *Science* 336: 554–554.
- 534 35. Pickrell JK, Coop G, Novembre J, Kudaravalli S, Li JZ, et al. (2009) Signals of recent positive  
535 selection in a worldwide sample of human populations. *Genome research* 19: 826–837.
- 536 36. Todd JA, Walker NM, Cooper JD, Smyth DJ, Downes K, et al. (2007) Robust associations of  
537 four new chromosome regions from genome-wide analyses of type 1 diabetes. *Nature genetics* 39:  
538 857–864.
- 539 37. Hunt KA, Zhernakova A, Turner G, Heap GA, Franke L, et al. (2008) Newly identified genetic risk  
540 variants for celiac disease related to the immune response. *Nature genetics* 40: 395–402.
- 541 38. Zhernakova A, Elbers CC, Ferwerda B, Romanos J, Trynka G, et al. (2010) Evolutionary and  
542 functional analysis of celiac risk loci reveals *sh2b3* as a protective factor against bacterial infection.  
543 *The American Journal of Human Genetics* 86: 970–977.
- 544 39. Kofler R, Schlötterer C (2012) Gowinda: unbiased analysis of gene set enrichment for genome-wide  
545 association studies. *Bioinformatics* 28: 2084–2085.
- 546 40. Castellano S, Parra G, Sánchez-Quinto FA, Racimo F, Kuhlwilm M, et al. (2014) Patterns of coding  
547 variation in the complete exomes of three neandertals. *Proceedings of the National Academy of*  
548 *Sciences* 111: 6666–6671.
- 549 41. Pravtcheva DD, Wise TL (2001) Disruption of *apc10/doc1* in three alleles of oligosyndactylism.  
550 *Genomics* 72: 78–87.
- 551 42. Kanehisa M, Goto S (2000) Kegg: kyoto encyclopedia of genes and genomes. *Nucleic acids research*  
552 28: 27–30.
- 553 43. Brawand D, Soumillon M, Necsulea A, Julien P, Csárdi G, et al. (2011) The evolution of gene  
554 expression levels in mammalian organs. *Nature* 478: 343–348.

- 555 44. Kircher M, Witten DM, Jain P, O’Roak BJ, Cooper GM, et al. (2014) A general framework for  
556 estimating the relative pathogenicity of human genetic variants. *Nature genetics* 46: 310–315.
- 557 45. Consortium EP, et al. (2012) An integrated encyclopedia of dna elements in the human genome.  
558 *Nature* 489: 57–74.
- 559 46. Rosenbloom KR, Dreszer TR, Long JC, Malladi VS, Sloan CA, et al. (2011) Encode whole-genome  
560 data in the ucsc genome browser: update 2012. *Nucleic acids research* : gkr1012.
- 561 47. Robinson PN, Köhler S, Bauer S, Seelow D, Horn D, et al. (2008) The human phenotype ontology:  
562 a tool for annotating and analyzing human hereditary disease. *The American Journal of Human*  
563 *Genetics* 83: 610–615.
- 564 48. Van Keuren M, Hart I, Kao FT, Neve R, Bruns G, et al. (1987) A somatic cell hybrid with a single  
565 human chromosome 22 corrects the defect in the cho mutant (ade-i) lacking adenylosuccinase  
566 activity. *Cytogenetic and Genome Research* 44: 142–147.
- 567 49. Gitiaux C, Ceballos-Picot I, Marie S, Valayannopoulos V, Rio M, et al. (2009) Misleading be-  
568 havioural phenotype with adenylosuccinate lyase deficiency. *European Journal of Human Genetics*  
569 17: 133–136.
- 570 50. Siepel A, Bejerano G, Pedersen JS, Hinrichs AS, Hou M, et al. (2005) Evolutionarily conserved  
571 elements in vertebrate, insect, worm, and yeast genomes. *Genome research* 15: 1034–1050.
- 572 51. Cooper GM, Goode DL, Ng SB, Sidow A, Bamshad MJ, et al. (2010) Single-nucleotide evolutionary  
573 constraint scores highlight disease-causing mutations. *Nature methods* 7: 250–251.
- 574 52. Kmoch S, Hartmannová H, Stibůrková B, Krijt J, Zikánová M, et al. (2000) Human adenylosucci-  
575 nate lyase (adsl), cloning and characterization of full-length cdna and its isoform, gene structure  
576 and molecular basis for adsl deficiency in six patients. *Human molecular genetics* 9: 1501–1513.
- 577 53. Maaswinkel-Mooij P, Laan L, Onkenhout W, Brouwer O, Jaeken J, et al. (1997) Adenylosuccinase  
578 deficiency presenting with epilepsy in early infancy. *Journal of inherited metabolic disease* 20:  
579 606–607.

- 580 54. Marie S, Cuppens H, Heuterspreute M, Jaspers M, Tola EZ, et al. (1999) Mutation analysis in  
581 adenylosuccinate lyase deficiency: Eight novel mutations in the re-evaluated full adsl coding se-  
582 quence. Human mutation 13: 197–202.
- 583 55. Race V, Marie S, Vincent MF, Van den Berghe G (2000) Clinical, biochemical and molecular  
584 genetic correlations in adenylosuccinate lyase deficiency. Human molecular genetics 9: 2159–2165.
- 585 56. Edery P, Chabrier S, Ceballos-Picot I, Marie S, Vincent MF, et al. (2003) Intrafamilial variability  
586 in the phenotypic expression of adenylosuccinate lyase deficiency: a report on three patients.  
587 American Journal of Medical Genetics Part A 120: 185–190.
- 588 57. Meister G, Landthaler M, Peters L, Chen PY, Urlaub H, et al. (2005) Identification of novel  
589 argonaute-associated proteins. Current biology 15: 2149–2155.
- 590 58. Du KL, Chen M, Li J, Lepore JJ, Mericko P, et al. (2004) Megakaryoblastic leukemia factor-1  
591 transduces cytoskeletal signals and induces smooth muscle cell differentiation from undifferentiated  
592 embryonic stem cells. Journal of Biological Chemistry 279: 17578–17586.
- 593 59. Mercher T, Busson-Le Coniat M, Monni R, Mauchauffé M, Khac FN, et al. (2001) Involvement of  
594 a human gene related to the drosophila spen gene in the recurrent t (1; 22) translocation of acute  
595 megakaryocytic leukemia. Proceedings of the National Academy of Sciences 98: 5776–5779.
- 596 60. Trahey M, Wong G, Halenbeck R, Rubinfeld B, Martin GA, et al. (1988) Molecular cloning of two  
597 types of gap complementary dna from human placenta. Science 242: 1697–1700.
- 598 61. Friedman E, Gejman PV, Martin GA, McCormick F (1993) Nonsense mutations in the c-terminal  
599 sh2 region of the gtpase activating protein (gap) gene in human tumours. Nature genetics 5:  
600 242–247.
- 601 62. Eerola I, Boon LM, Mulliken JB, Burrows PE, Domp Martin A, et al. (2003) Capillary  
602 malformation–arteriovenous malformation, a new clinical and genetic disorder caused by *rasa1*  
603 mutations. The American Journal of Human Genetics 73: 1240–1249.
- 604 63. Hershkovitz D, Bercovich D, Sprecher E, Lapidot M (2008) *Rasa1* mutations may cause hereditary  
605 capillary malformations without arteriovenous malformations. British Journal of Dermatology 158:  
606 1035–1040.

- 607 64. Whiting PJ, Bonnert TP, McKernan RM, Farrar S, Bourdelles BL, et al. (1999) Molecular and  
608 functional diversity of the expanding gaba-a receptor gene family. *Annals of the New York Academy*  
609 *of Sciences* 868: 645–653.
- 610 65. Edenberg HJ, Dick DM, Xuei X, Tian H, Almasy L, et al. (2004) Variations in *gabra2*, encoding  
611 the  $\alpha 2$  subunit of the gaba a receptor, are associated with alcohol dependence and with brain  
612 oscillations. *The American Journal of Human Genetics* 74: 705–714.
- 613 66. Knabl J, Witschi R, Hösl K, Reinold H, Zeilhofer UB, et al. (2008) Reversal of pathological pain  
614 through specific spinal gabaa receptor subtypes. *Nature* 451: 330–334.
- 615 67. Xiang YY, Wang S, Liu M, Hirota JA, Li J, et al. (2007) A gabaergic system in airway epithelium  
616 is essential for mucus overproduction in asthma. *Nature medicine* 13: 862–867.
- 617 68. Ma D, Whitehead P, Menold M, Martin E, Ashley-Koch A, et al. (2005) Identification of significant  
618 association and gene-gene interaction of gaba receptor subunit genes in autism. *The American*  
619 *Journal of Human Genetics* 77: 377–388.
- 620 69. Collins AL, Ma D, Whitehead PL, Martin ER, Wright HH, et al. (2006) Investigation of autism  
621 and gaba receptor subunit genes in multiple ethnic groups. *Neurogenetics* 7: 167–174.
- 622 70. Ariani F, Hayek G, Rondinella D, Artuso R, Mencarelli MA, et al. (2008) *Foxg1* is responsible for  
623 the congenital variant of rett syndrome. *The American Journal of Human Genetics* 83: 89–93.
- 624 71. Mencarelli M, Spanhol-Rosseto A, Artuso R, Rondinella D, De Filippis R, et al. (2010) Novel *foxg1*  
625 mutations associated with the congenital variant of rett syndrome. *Journal of medical genetics* 47:  
626 49–53.
- 627 72. Sadakata T, Furuichi T (2010) *Ca* <sup>2+</sup>-dependent activator protein for secretion 2 and autistic-like  
628 phenotypes. *Neuroscience research* 67: 197–202.
- 629 73. Crisci JL, Wong A, Good JM, Jensen JD (2011) On characterizing adaptive events unique to  
630 modern humans. *Genome biology and evolution* 3: 791–798.
- 631 74. Guilherme A, Soriano NA, Furcinitti PS, Czech MP (2004) Role of *ehd1* and *ehbp1* in perinuclear  
632 sorting and insulin-regulated *glut4* recycling in 3t3-l1 adipocytes. *Journal of Biological Chemistry*  
633 279: 40062–40075.



- 634 75. Gudmundsson J, Sulem P, Rafnar T, Bergthorsson JT, Manolescu A, et al. (2008) Common se-  
635 quence variants on 2p15 and xp11. 22 confer susceptibility to prostate cancer. *Nature genetics* 40:  
636 281–283.
- 637 76. Gong S, Zheng C, Doughty ML, Losos K, Didkovsky N, et al. (2003) A gene expression atlas of  
638 the central nervous system based on bacterial artificial chromosomes. *Nature* 425: 917–925.
- 639 77. Pennacchio LA, Ahituv N, Moses AM, Prabhakar S, Nobrega MA, et al. (2006) In vivo enhancer  
640 analysis of human conserved non-coding sequences. *Nature* 444: 499–502.
- 641 78. Li MJ, Wang P, Liu X, Lim EL, Wang Z, et al. (2011) Gwasdb: a database for human genetic  
642 variants identified by genome-wide association studies. *Nucleic acids research* : gkr1182.
- 643 79. Welter D, MacArthur J, Morales J, Burdett T, Hall P, et al. (2014) The nhgri gwas catalog, a  
644 curated resource of snp-trait associations. *Nucleic acids research* 42: D1001–D1006.
- 645 80. Paternoster L, Evans DM, Nohr EA, Holst C, Gaborieau V, et al. (2011) Genome-wide population-  
646 based association study of extremely overweight young adults—the goya study. *PLoS One* 6: e24303.
- 647 81. Suhre K, Wallaschofski H, Raffler J, Friedrich N, Haring R, et al. (2011) A genome-wide association  
648 study of metabolic traits in human urine. *Nature genetics* 43: 565–569.
- 649 82. Perlis RH, Huang J, Purcell S, Fava M, Rush AJ, et al. (2010) Genome-wide association study of  
650 suicide attempts in mood disorder patients. *Genome* 167.
- 651 83. Henrion M, Frampton M, Scelo G, Purdue M, Ye Y, et al. (2013) Common variation at 2q22. 3  
652 (zeb2) influences the risk of renal cancer. *Human molecular genetics* 22: 825–831.
- 653 84. Schlebusch CM, Skoglund P, Sjödin P, Gattepaille LM, Hernandez D, et al. (2012) Genomic varia-  
654 tion in seven khoe-san groups reveals adaptation and complex african history. *Science* 338: 374–379.
- 655 85. Sabeti PC, Reich DE, Higgins JM, Levine HZ, Richter DJ, et al. (2002) Detecting recent positive  
656 selection in the human genome from haplotype structure. *Nature* 419: 832–837.
- 657 86. Hernandez RD, Kelley JL, Elyashiv E, Melton SC, Auton A, et al. (2011) Classic selective sweeps  
658 were rare in recent human evolution. *science* 331: 920–924.

- 659 87. Pace L, Salvan A, Sartori N (2011) Adjusting composite likelihood ratio statistics. *Statistica Sinica*  
660 21: 129.
- 661 88. Fu Q, Li H, Moorjani P, Jay F, Slepchenko SM, et al. (2014) Genome sequence of a 45,000-year-old  
662 modern human from western siberia. *Nature* 514: 445–449.
- 663 89. Seguin-Orlando A, Korneliussen TS, Sikora M, Malaspinas AS, Manica A, et al. (2014) Genomic  
664 structure in europeans dating back at least 36,200 years. *Science* 346: 1113–1118.
- 665 90. Lazaridis I, Patterson N, Mitnik A, Renaud G, Mallick S, et al. (2014) Ancient human genomes  
666 suggest three ancestral populations for present-day europeans. *Nature* 513: 409–413.
- 667 91. Pickrell JK, Pritchard JK (2012) Inference of population splits and mixtures from genome-wide  
668 allele frequency data. *PLoS genetics* 8: e1002967.

## 669 Tables

**Table 1. Description of models tested.** All times are in generations. Selection in the "ancestral population" refers to a selective sweep where the beneficial mutation and fixation occurred before the split time of the two most closely related populations. Selection in "daughter population A" refers to a selective sweep that occurred in one of the two most closely related populations (A), after their split from each other.

| Model | Population where selection occurred | $t_{AB}$ | $t_{ABC}$ | $t_M$ | s   | $N_e$  |
|-------|-------------------------------------|----------|-----------|-------|-----|--------|
| A     | Ancestral population                | 500      | 2,000     | 1,800 | 0.1 | 10,000 |
| B     | Ancestral population                | 1,000    | 4,000     | 2,500 | 0.1 | 10,000 |
| C     | Ancestral population                | 2,000    | 4,000     | 3,500 | 0.1 | 10,000 |
| D     | Ancestral population                | 3,000    | 8,000     | 5,000 | 0.1 | 10,000 |
| E     | Ancestral population                | 2,000    | 16,000    | 8,000 | 0.1 | 10,000 |
| F     | Ancestral population                | 4,000    | 16,000    | 8,000 | 0.1 | 10,000 |
| I     | Daughter population A               | 2,000    | 4,000     | 1,000 | 0.1 | 10,000 |
| J     | Daughter population A               | 3,000    | 8,000     | 2,000 | 0.1 | 10,000 |

**Table 2. Top hits for 3P-CLR run on the European terminal branch, using Africans as the outgroup.** We show the windows in the top 99.9% quantile of scores. Windows were merged together if they were contiguous. Win max = Location of window with maximum score. Win start = left-most end of left-most window for each region. Win end = right-most end of right-most window for each region. All positions were rounded to the nearest 100 bp. Score max = maximum score within region.

| chr | Win max   | Win start | Win end   | Score max | Genes within region                                                                                                                                                                                                                                                                                                                                                                           |
|-----|-----------|-----------|-----------|-----------|-----------------------------------------------------------------------------------------------------------------------------------------------------------------------------------------------------------------------------------------------------------------------------------------------------------------------------------------------------------------------------------------------|
| 17  | 19175100  | 18858600  | 19445800  | 213.864   | SLC5A10,FAM83G,GRAP,GRAPL,EPN2,B9D1,MAPK7,MFAP4,RNF112,SLC47A1                                                                                                                                                                                                                                                                                                                                |
| 15  | 29241200  | 29210600  | 29338200  | 180.648   | APBA2                                                                                                                                                                                                                                                                                                                                                                                         |
| 14  | 66765100  | 66417200  | 67923400  | 176.032   | GPHN,FAM71D,MPP5,ATP6V1D,EIF2S1,PLEK2,TMEM229B                                                                                                                                                                                                                                                                                                                                                |
| 10  | 74736500  | 74007800  | 75402200  | 161.652   | DDIT4,DNAJB12,MICU1,MCU,OIT3,PLA2G12B,P4HA1,NUDT13,ECD,FAM149B1,DNAJC9,MRPS16,TTC18,ANXA7,MSS51,PPP3CB,USP54,MYOZ1,DLGAP3,ZMYM6NB,ZMYM6,ZMYM1,SFPQ,ZMYM4,KIAA0319L,NCDN,TFAP2E,PSMB2,C1orf216,CLSPN,AGO4,AGO1,AGO3,TEKT2,ADPRHL2,COL8A2,RASGRP2,PYGM,SF1,MAP4K2,MEN1,SLC22A11,SLC22A12,NRXN2,BRAP,ACAD10,ALDH2,MAPKAPK5,TMEM116,ERP29,NAA25,TRAFD1,RPL6,PTPN11,RPH3A,CUX2,FAM109A,SH2B3,ATXN2 |
| 1   | 35623900  | 35380800  | 36584500  | 150.189   | INO80B,WBP1,MOGS,MRPL53,CCDC142,TTC31,LBX2,PCGF1,TLX2,DQX1,AUP1,NOTO,SMYD5,PRADC1,CCT7,HTRA2,LOXL3,DOK1,M1AP,SEMA4F,FBXO41,EGR4,ALMS1,NAT8,TPRKB,DUSP11,C2orf78,STAMBP,ACTG2,DGUOK,TET3,C15orf43,SORD,DUOX2,DUOXA2,DUOXA1,DUOX1                                                                                                                                                               |
| 11  | 64581000  | 64217100  | 64588600  | 148.952   | ZSCAN25,CYP3A5,CYP3A7,CYP3A4,SMURF1,KPNA7,ARPC1A,ARPC1B,PDAP1,BUD31,PTCD1,ATP5J2                                                                                                                                                                                                                                                                                                              |
| 12  | 113010000 | 111691000 | 113030000 | 145.64    | PTCD1,CPSF4,ATP5J2,ZNF789,ZNF394,ZKSCAN5,FAM200A,ZNF655                                                                                                                                                                                                                                                                                                                                       |
| 2   | 74507400  | 73404200  | 74970500  | 137.92    | THSD4,MYO9A,SENPA8,GRAMD2,PKM,PARP6,CELF6,HEXA,TMEM202,ARIH1,GOLGA6B,BBS4,ADPGK                                                                                                                                                                                                                                                                                                               |
| 15  | 45332100  | 45094600  | 45436600  | 137.885   | SPIN1,NXN2                                                                                                                                                                                                                                                                                                                                                                                    |
| 7   | 98882800  | 98717700  | 99369400  | 135.106   | NRG3                                                                                                                                                                                                                                                                                                                                                                                          |
| 15  | 72654000  | 72057800  | 73138200  | 132.697   | FGF1,ARHGAP26                                                                                                                                                                                                                                                                                                                                                                                 |
| 9   | 91155000  | 90913100  | 91201600  | 125.597   | ZEB1                                                                                                                                                                                                                                                                                                                                                                                          |
| 10  | 83601100  | 83597800  | 83761400  | 120.455   | CCDC102B                                                                                                                                                                                                                                                                                                                                                                                      |
| 5   | 142116000 | 142074000 | 142194000 | 117.87    | -                                                                                                                                                                                                                                                                                                                                                                                             |
| 10  | 31863100  | 31479100  | 31908500  | 113.751   | IMPG1                                                                                                                                                                                                                                                                                                                                                                                         |
| 18  | 66807000  | 66646700  | 66883000  | 108.186   | -                                                                                                                                                                                                                                                                                                                                                                                             |
| 2   | 104933000 | 104749000 | 105027000 | 107.684   | -                                                                                                                                                                                                                                                                                                                                                                                             |
| 6   | 76751700  | 76636000  | 77261200  | 106.577   | -                                                                                                                                                                                                                                                                                                                                                                                             |
| 7   | 81142700  | 81087600  | 81298600  | 104.727   | -                                                                                                                                                                                                                                                                                                                                                                                             |
| 4   | 167411000 | 167094000 | 167644000 | 104.554   | -                                                                                                                                                                                                                                                                                                                                                                                             |
| 21  | 21424100  | 21378700  | 21643900  | 104.405   | -                                                                                                                                                                                                                                                                                                                                                                                             |
| 2   | 216600000 | 216551000 | 216628000 | 103.798   | -                                                                                                                                                                                                                                                                                                                                                                                             |
| 17  | 58512800  | 58075800  | 59174400  | 103.791   | HEATR6,CA4,USP32,C1orf64,APPBP2,PPM1D,BCAS3                                                                                                                                                                                                                                                                                                                                                   |
| 5   | 123509000 | 123370000 | 123604000 | 103.386   | -                                                                                                                                                                                                                                                                                                                                                                                             |
| 6   | 150686000 | 150637000 | 150738000 | 103.115   | IYD                                                                                                                                                                                                                                                                                                                                                                                           |
| 15  | 35551700  | 35444900  | 35727400  | 102.676   | DPH6                                                                                                                                                                                                                                                                                                                                                                                          |
| 6   | 121627000 | 121082000 | 121788000 | 102.59    | TBC1D32,GJA1                                                                                                                                                                                                                                                                                                                                                                                  |
| 4   | 60872200  | 60814500  | 61356600  | 98.9547   | -                                                                                                                                                                                                                                                                                                                                                                                             |
| 9   | 108572000 | 108412000 | 108755000 | 98.9047   | TAL2,TMEM38B                                                                                                                                                                                                                                                                                                                                                                                  |
| 1   | 204823000 | 204680000 | 204872000 | 98.6962   | NFASC                                                                                                                                                                                                                                                                                                                                                                                         |
| 20  | 53878400  | 53876100  | 54051800  | 95.6355   | -                                                                                                                                                                                                                                                                                                                                                                                             |
| 10  | 93143500  | 93060300  | 93325000  | 95.5239   | HECTD2                                                                                                                                                                                                                                                                                                                                                                                        |
| 1   | 162116000 | 162002000 | 162228000 | 95.4304   | NOS1AP                                                                                                                                                                                                                                                                                                                                                                                        |
| 9   | 12777200  | 12488900  | 12787600  | 95.1877   | TYRP1,LURAP1L                                                                                                                                                                                                                                                                                                                                                                                 |
| 18  | 7330950   | 7259810   | 7374120   | 93.1786   | -                                                                                                                                                                                                                                                                                                                                                                                             |
| 3   | 188661000 | 188641000 | 188840000 | 91.5491   | TPRG1                                                                                                                                                                                                                                                                                                                                                                                         |
| 15  | 52859500  | 52581800  | 52992200  | 91.5176   | MYO5C,MYO5A,ARPP19,FAM214A                                                                                                                                                                                                                                                                                                                                                                    |
| 15  | 48211200  | 48153900  | 48308500  | 90.9933   | -                                                                                                                                                                                                                                                                                                                                                                                             |
| 12  | 80298900  | 80117100  | 80435100  | 90.0939   | PPPIR12A                                                                                                                                                                                                                                                                                                                                                                                      |
| 11  | 38229500  | 37879000  | 38607000  | 86.7175   | -                                                                                                                                                                                                                                                                                                                                                                                             |
| 5   | 82679100  | 82488400  | 82790300  | 85.7742   | XRCC4,VCAN                                                                                                                                                                                                                                                                                                                                                                                    |
| 6   | 43624100  | 43419100  | 43688500  | 85.5502   | DLK2,TJAP1,LRRRC73,POLR1C,YIPF3,XPO5,POLH,GTPBP2,MAD2L1BP,RSPH9,MRPS18A                                                                                                                                                                                                                                                                                                                       |
| 13  | 48977600  | 48726500  | 49291500  | 85.2064   | ITM2B,RB1,LPAR6,RCBTB2,CYSLTR2                                                                                                                                                                                                                                                                                                                                                                |
| 1   | 53568300  | 53124700  | 53633500  | 84.8166   | FAM159A,COA7,ZYG11B,ZYG11A,ECHDC2,SCP2,PODN,SLC1A7                                                                                                                                                                                                                                                                                                                                            |
| 10  | 54166700  | 54130800  | 54335700  | 84.1889   | -                                                                                                                                                                                                                                                                                                                                                                                             |
| 8   | 15994200  | 15838700  | 15997700  | 83.0166   | MSR1                                                                                                                                                                                                                                                                                                                                                                                          |
| 15  | 94107900  | 94022200  | 94185300  | 82.8563   | -                                                                                                                                                                                                                                                                                                                                                                                             |
| 11  | 129910000 | 129805000 | 130073000 | 82.6407   | PRDM10,APLP2,ST14                                                                                                                                                                                                                                                                                                                                                                             |

**Table 3. Top hits for 3P-CLR run on the East Asian terminal branch, using Africans as the outgroup.** We show the windows in the top 99.9% quantile of scores. Windows were merged together if they were contiguous. Win max = Location of window with maximum score. Win start = left-most end of left-most window for each region. Win end = right-most end of right-most window for each region. All positions were rounded to the nearest 100 bp. Score max = maximum score within region.

| chr | Win max   | Win start | Win end   | Score max | Genes within region                                                                                                                                                                                                                                                                                                                                                                                                                                               |
|-----|-----------|-----------|-----------|-----------|-------------------------------------------------------------------------------------------------------------------------------------------------------------------------------------------------------------------------------------------------------------------------------------------------------------------------------------------------------------------------------------------------------------------------------------------------------------------|
| 5   | 117510000 | 117345000 | 117716000 | 270.211   | -                                                                                                                                                                                                                                                                                                                                                                                                                                                                 |
| 3   | 58238900  | 58104900  | 58557500  | 257.128   | FLNB, DNASE1L3, ABHD6, RPP14, PXX, PDHB, KCTD6, ACOX2, FAM107A                                                                                                                                                                                                                                                                                                                                                                                                    |
| 10  | 94874300  | 94840100  | 95720400  | 235.225   | MYOF, CEP55, FFAR4, RBP4, PDE6C, FRA10AC1, LGI1, SLC35G1                                                                                                                                                                                                                                                                                                                                                                                                          |
| 15  | 64166100  | 63723000  | 64339800  | 231.645   | USP3, FBXL22, HERC1, DAPK2                                                                                                                                                                                                                                                                                                                                                                                                                                        |
| 4   | 42193900  | 41823000  | 42206800  | 231.205   | TMEM33, DCAF4L1, SLC30A9, BEND4                                                                                                                                                                                                                                                                                                                                                                                                                                   |
| 2   | 72378700  | 72353700  | 73177300  | 221.359   | CYP26B1, EXOC6B, SPR, EMX1, SFXN5                                                                                                                                                                                                                                                                                                                                                                                                                                 |
| 1   | 234347000 | 234207000 | 234380000 | 208.215   | SLC35F3                                                                                                                                                                                                                                                                                                                                                                                                                                                           |
| 11  | 25172400  | 25098500  | 25276200  | 206.418   | LUZP2                                                                                                                                                                                                                                                                                                                                                                                                                                                             |
| 4   | 158638000 | 158481000 | 158740000 | 190.705   | -                                                                                                                                                                                                                                                                                                                                                                                                                                                                 |
| 17  | 61536300  | 60912100  | 61549600  | 185.021   | TANC2, CYB561                                                                                                                                                                                                                                                                                                                                                                                                                                                     |
| 20  | 24793800  | 24570100  | 25037800  | 177.801   | SYNDIG1, CST7, APMAP, ACSS1                                                                                                                                                                                                                                                                                                                                                                                                                                       |
| 4   | 86504400  | 86438300  | 86602900  | 173.091   | ARHGAP24                                                                                                                                                                                                                                                                                                                                                                                                                                                          |
| 10  | 56026900  | 55868800  | 56209000  | 172.266   | PCDH15                                                                                                                                                                                                                                                                                                                                                                                                                                                            |
| 1   | 75622900  | 75277800  | 76729300  | 167.716   | LHX8, SLC44A5, ACADM, RABGGTB, MSH4, ASB17, ST6GALNAC3                                                                                                                                                                                                                                                                                                                                                                                                            |
| 18  | 5299800   | 5203000   | 5314080   | 163.435   | ZBTB14                                                                                                                                                                                                                                                                                                                                                                                                                                                            |
| 7   | 112265000 | 112125000 | 112622000 | 157.219   | LSMEM1, TMEM168, C7orf60                                                                                                                                                                                                                                                                                                                                                                                                                                          |
| 8   | 10836400  | 10559800  | 11126200  | 150.728   | RP1L1, SOX7, PINX1, XKR6                                                                                                                                                                                                                                                                                                                                                                                                                                          |
| 1   | 172931000 | 172670000 | 172950000 | 149.67    | -                                                                                                                                                                                                                                                                                                                                                                                                                                                                 |
| 4   | 135424000 | 134792000 | 135547000 | 149.303   | -                                                                                                                                                                                                                                                                                                                                                                                                                                                                 |
| 10  | 53363100  | 53226200  | 53440300  | 147.8     | PRKG1                                                                                                                                                                                                                                                                                                                                                                                                                                                             |
| 7   | 1.09E+08  | 108741000 | 109226000 | 146.998   | -                                                                                                                                                                                                                                                                                                                                                                                                                                                                 |
| 13  | 63542000  | 63261200  | 63971200  | 146.966   | -                                                                                                                                                                                                                                                                                                                                                                                                                                                                 |
| 3   | 102005000 | 101902000 | 102242000 | 146.338   | ZPLD1                                                                                                                                                                                                                                                                                                                                                                                                                                                             |
| 6   | 69974500  | 69524500  | 70359500  | 144.236   | BAI3                                                                                                                                                                                                                                                                                                                                                                                                                                                              |
| 2   | 56096500  | 55929400  | 56198400  | 139.435   | EFEMP1                                                                                                                                                                                                                                                                                                                                                                                                                                                            |
| 2   | 109534000 | 108937000 | 109626000 | 139.089   | LIMS1, RANBP2, CCDC138, EDAR, SULF1, C4, GCC2                                                                                                                                                                                                                                                                                                                                                                                                                     |
| 22  | 46760700  | 46594600  | 46831200  | 138.989   | PPARA, CDPF1, PKDREJ, TTC38, GTSE1, TRMU, CELSR1                                                                                                                                                                                                                                                                                                                                                                                                                  |
| 3   | 104826000 | 104604000 | 104910000 | 138.473   | -                                                                                                                                                                                                                                                                                                                                                                                                                                                                 |
| 18  | 67572500  | 67533400  | 67877100  | 138.033   | CD226, RTTN                                                                                                                                                                                                                                                                                                                                                                                                                                                       |
| 2   | 26159900  | 25853900  | 26233500  | 135.742   | KIF3C, DTNB                                                                                                                                                                                                                                                                                                                                                                                                                                                       |
| 20  | 31604100  | 31304800  | 31614200  | 134.323   | COMMD7, DNMT3B, MAPRE1, SUN5, BPIFB2                                                                                                                                                                                                                                                                                                                                                                                                                              |
| 2   | 17456900  | 17247000  | 17564600  | 134.267   | -                                                                                                                                                                                                                                                                                                                                                                                                                                                                 |
| 4   | 28858500  | 28537900  | 28879000  | 131.871   | -                                                                                                                                                                                                                                                                                                                                                                                                                                                                 |
| 9   | 107052000 | 106657000 | 107058000 | 131.263   | SMC2                                                                                                                                                                                                                                                                                                                                                                                                                                                              |
| 12  | 93322200  | 92983200  | 93454700  | 129.603   | C12orf74, PLEKHG7, EEA1                                                                                                                                                                                                                                                                                                                                                                                                                                           |
| 4   | 80074800  | 79878800  | 80250300  | 129.59    | NAA11                                                                                                                                                                                                                                                                                                                                                                                                                                                             |
| 5   | 153541000 | 153053000 | 153736000 | 129.577   | GRIA1, FAM114A2, MFAP3, GALNT10                                                                                                                                                                                                                                                                                                                                                                                                                                   |
| 14  | 77987200  | 77720700  | 78086400  | 126.295   | TMEM63C, NGB, POMT2, GSTZ1, TMED8, SAMD15, NOXRED1, VIPAS39, AHSA1, ISM2, SPTLC2                                                                                                                                                                                                                                                                                                                                                                                  |
| 6   | 8002470   | 7975450   | 8112550   | 125.312   | TXNDC5, BLOC1S5, EEFL1                                                                                                                                                                                                                                                                                                                                                                                                                                            |
| 12  | 124021000 | 123925000 | 124275000 | 125.199   | SNRNP35, RILPL1, TMED2, DDX55, EIF2B1, GTF2H3, TCTN2, ATP6V0A2, DNAH10                                                                                                                                                                                                                                                                                                                                                                                            |
| 10  | 97039700  | 96682100  | 97059000  | 125.048   | CYP2C9, CYP2C8, C10orf129, PDLIM1                                                                                                                                                                                                                                                                                                                                                                                                                                 |
| 16  | 67607200  | 66947800  | 68430200  | 124.191   | ACD, PARD6A, ENKD1, C16orf86, GFOD2, RANBP10, TSNAXIP1, CENPT, THAP11, NUTF2, EDC4, NRN1L, PSKH1, CTRL, PSMB10, LCAT, SLC12A4, DPEP3, DPEP2, DUS2, DDX28, NFATC3, ESRP2, PLA2G15, SLC7A6, SLC7A6OS, PRMT7, SMPD3, CDH16, RRAD, FAM96B, CES2, CES3, CES4A, CBFB, C16orf70, B3GNT9, TRADD, FBXL8, HSF4, NOL3, KIAA0895L, EXOC3L1, E2F4, ELMO3, LRRC29, TMEM208, FHOD1, SLC9A5, FLEKHG4, KCTD19, LRRC36, TPPP3, ZDHHC1, HSD11B2, ATP6V0D1, AGRP, FAM65A, CTCF, RLTPR |
| 12  | 103350000 | 103178000 | 103439000 | 123.87    | PAH, ASCL1                                                                                                                                                                                                                                                                                                                                                                                                                                                        |
| 5   | 111988000 | 111981000 | 112344000 | 123.442   | APC, SRP19, REEP5, DCP2                                                                                                                                                                                                                                                                                                                                                                                                                                           |
| 14  | 69489100  | 69424000  | 69782800  | 122.252   | ACTN1, DCAF5, EXD2, GALNT16                                                                                                                                                                                                                                                                                                                                                                                                                                       |
| 3   | 17197100  | 17188900  | 17897600  | 122.173   | TBC1D5                                                                                                                                                                                                                                                                                                                                                                                                                                                            |

**Table 4. Top hits for 3P-CLR run on the Eurasian ancestral branch, using Africans as the outgroup.** We show the windows in the top 99.9% quantile of scores. Windows were merged together if they were contiguous. Win max = Location of window with maximum score. Win start = left-most end of left-most window for each region. Win end = right-most end of right-most window for each region. All positions were rounded to the nearest 100 bp. Score max = maximum score within region.

| chr | Win max   | Win start | Win end   | Score max | Genes within region                                                                                                                                                                                                                                                                         |
|-----|-----------|-----------|-----------|-----------|---------------------------------------------------------------------------------------------------------------------------------------------------------------------------------------------------------------------------------------------------------------------------------------------|
| 17  | 58778100  | 58075800  | 59308200  | 549.661   | HEATR6,CA4,USP32,C17orf64,APPBP2,PPM1D,BCAS3                                                                                                                                                                                                                                                |
| 10  | 22705100  | 22428900  | 22798800  | 500.245   | EBLN1,COMMD3,COMMD3-BMI1,BMI1,SPAG6                                                                                                                                                                                                                                                         |
| 4   | 41834200  | 41452400  | 42195900  | 496.603   | LIMCH1,PHOX2B,TMEM33,DCAF4L1,SLC30A9,BEND4                                                                                                                                                                                                                                                  |
| 18  | 67572500  | 67533400  | 67881500  | 493.711   | CD226,RTTN                                                                                                                                                                                                                                                                                  |
| 17  | 62870600  | 62655400  | 63061700  | 484.401   | SMURF2,LRRC37A3,GNA13                                                                                                                                                                                                                                                                       |
| 7   | 99227800  | 98717700  | 99374100  | 446.801   | ZSCAN25,CYP3A5,CYP3A7,CYP3A4,SMURF1,KPNA7,ARPC1A,ARPC1B,PDAP1,BUD31,PTCD1,ATP5J2-<br>ZSCAN25,CYP3A5,CYP3A7,CYP3A4,SMURF1,KPNA7,ARPC1A,ARPC1B,PDAP1,BUD31,PTCD1,ATP5J2-<br>CYP26B1,EXOC6B,SPR,EMX1,SFXN5,RAB11FIP5,NOTO,SMYD5,PRADC1,CCT7,FBXO41,EGR4,ALMS1,NAT8,TPRKB,DUSP11,C2orf78,STAMBP |
| 2   | 73545700  | 72370500  | 74117400  | 444.484   | HECTD2                                                                                                                                                                                                                                                                                      |
| 10  | 93143500  | 93049100  | 93325000  | 440.141   | -                                                                                                                                                                                                                                                                                           |
| 1   | 230018000 | 229912000 | 230132000 | 437.859   | -                                                                                                                                                                                                                                                                                           |
| 2   | 22420000  | 22187700  | 22469200  | 436.745   | -                                                                                                                                                                                                                                                                                           |
| 17  | 61536300  | 60888200  | 61549600  | 435.653   | TANC2,CYB561                                                                                                                                                                                                                                                                                |
| 20  | 54054100  | 53877600  | 54056600  | 429.932   | -                                                                                                                                                                                                                                                                                           |
| 9   | 90946300  | 90908100  | 91200000  | 426.111   | SPIN1,NXNL2                                                                                                                                                                                                                                                                                 |
| 8   | 30625000  | 30515900  | 30891400  | 416.16    | GSR,PPP2CB,TEX15,PURG,WRN                                                                                                                                                                                                                                                                   |
| 11  | 39699100  | 39604100  | 39937900  | 413.515   | -                                                                                                                                                                                                                                                                                           |
| 6   | 10644100  | 10578900  | 10784300  | 408.918   | GCNT2,C6orf52,PAK1IP1,TMEM14C,TMEM14B,SYCP2L,MAK                                                                                                                                                                                                                                            |
| 3   | 188751000 | 188646000 | 188859000 | 400.376   | TPRG1                                                                                                                                                                                                                                                                                       |
| 1   | 64483200  | 64340800  | 64538400  | 398.325   | ROR1                                                                                                                                                                                                                                                                                        |
| 10  | 31863100  | 31479100  | 31908500  | 397.626   | ZEB1                                                                                                                                                                                                                                                                                        |
| 4   | 177625000 | 177608000 | 177889000 | 395.393   | VEGFC                                                                                                                                                                                                                                                                                       |
| 14  | 57824300  | 57607700  | 58048400  | 392.93    | EXOC5,AP5M1,NAA30,C14orf105                                                                                                                                                                                                                                                                 |
| 10  | 66018600  | 65795200  | 66311900  | 389.492   | -                                                                                                                                                                                                                                                                                           |
| 11  | 19609000  | 19591300  | 19731200  | 387.843   | NAV2                                                                                                                                                                                                                                                                                        |
| 13  | 49136300  | 48726500  | 49293400  | 386.345   | ITM2B,RB1,LPAR6,RCBTB2,CYSLTR2                                                                                                                                                                                                                                                              |
| 4   | 13424000  | 13143500  | 13535500  | 379.283   | RAB28                                                                                                                                                                                                                                                                                       |
| 8   | 52617300  | 52362200  | 52930500  | 377.6     | PXDNL,PCMTD1                                                                                                                                                                                                                                                                                |
| 6   | 3149410   | 3073260   | 3204820   | 376.252   | RIPK1,BPHL,TUBB2A                                                                                                                                                                                                                                                                           |
| 1   | 25592800  | 25517600  | 25869600  | 372.377   | SYF2,C1orf63,RHD,TMEM50A,RHCE,TMEM57                                                                                                                                                                                                                                                        |
| 3   | 97346000  | 96453200  | 97364600  | 371.806   | EPHA6                                                                                                                                                                                                                                                                                       |
| 6   | 105946000 | 105800000 | 105954000 | 371.534   | PREP                                                                                                                                                                                                                                                                                        |
| 15  | 45332100  | 45094600  | 45436600  | 369.82    | C15orf43,SORD,DUOX2,DUOX2A,DUOX1,DUOX1                                                                                                                                                                                                                                                      |
| 12  | 111447000 | 111331000 | 111655000 | 368.231   | CCDC63,MYL2,CUX2                                                                                                                                                                                                                                                                            |
| 6   | 131952000 | 131736000 | 132060000 | 366.757   | ARG1,MED23,ENPP3,OR2A4,CTAGE9                                                                                                                                                                                                                                                               |
| 5   | 11741300  | 11640500  | 11850200  | 365.997   | CTNND2                                                                                                                                                                                                                                                                                      |
| 1   | 116880000 | 116723000 | 117028000 | 365.955   | ATP1A1                                                                                                                                                                                                                                                                                      |
| 8   | 43401200  | 42499600  | 49036000  | 364.188   | CHRN3,CHRNA6,THAP1,RNF170,HOK3,FNTA,POMK,HGSNAT,SPIDR,CEBPD,MCM4,UBE2V2                                                                                                                                                                                                                     |
| 7   | 30270500  | 30178800  | 30471600  | 360.954   | MTURN,ZNRF2,NOD1                                                                                                                                                                                                                                                                            |
| 4   | 33576600  | 33301000  | 33643000  | 359.425   | -                                                                                                                                                                                                                                                                                           |

**Table 5. Enriched GO categories in the European, East Asian and Eurasian branches.** We tested for ontology enrichment among the regions in the 99% quantile of the 3P-CLR scores for each population branch ( $P < 0.05$ , FDR  $< 0.2$ ).

| Population Branch | Raw p-value | FDR         | GO category                                                                         |
|-------------------|-------------|-------------|-------------------------------------------------------------------------------------|
| Europe            | 0.00001     | 0.009243333 | protein localization to membrane                                                    |
| Europe            | 0.00001     | 0.009243333 | cellular protein localization                                                       |
| Europe            | 0.00001     | 0.009243333 | cellular macromolecule localization                                                 |
| Europe            | 0.00003     | 0.016986    | single-organism cellular localization                                               |
| Europe            | 0.00003     | 0.016986    | single-organism localization                                                        |
| Europe            | 0.00005     | 0.019915556 | NAD(P)H oxidase activity                                                            |
| Europe            | 0.00005     | 0.019915556 | cellular localization                                                               |
| Europe            | 0.00006     | 0.019915556 | thyroid hormone generation                                                          |
| Europe            | 0.00006     | 0.019915556 | cuticle development                                                                 |
| Europe            | 0.0001      | 0.029226923 | protein localization                                                                |
| Europe            | 0.00012     | 0.029226923 | thyroid hormone metabolic process                                                   |
| Europe            | 0.00013     | 0.029226923 | antioxidant activity                                                                |
| Europe            | 0.00013     | 0.029226923 | macromolecule localization                                                          |
| Europe            | 0.00018     | 0.041946429 | cellular response to reactive oxygen species                                        |
| Europe            | 0.00022     | 0.047034444 | protein localization to plasma membrane                                             |
| Europe            | 0.00024     | 0.047034444 | hydrogen peroxide catabolic process                                                 |
| Europe            | 0.00026     | 0.047034444 | oxidoreductase activity, acting on peroxide as acceptor                             |
| Europe            | 0.00026     | 0.047034444 | peroxidase activity                                                                 |
| Europe            | 0.00034     | 0.061767895 | cellular component assembly involved in morphogenesis                               |
| Europe            | 0.0004      | 0.069824    | cellular response to hydrogen peroxide                                              |
| Europe            | 0.00052     | 0.085701905 | bicarbonate transport                                                               |
| Europe            | 0.00055     | 0.087832273 | oxidoreductase activity, acting on NAD(P)H, oxygen as acceptor                      |
| Europe            | 0.00073     | 0.112074348 | cell-cell junction                                                                  |
| Europe            | 0.00085     | 0.127015    | recycling endosome membrane                                                         |
| Europe            | 0.00101     | 0.144204    | MLL5-L complex                                                                      |
| Europe            | 0.00108     | 0.146987037 | single-organism membrane organization                                               |
| Europe            | 0.00112     | 0.146987037 | interleukin-2 biosynthetic process                                                  |
| Europe            | 0.00143     | 0.171870313 | plasma membrane organization                                                        |
| Europe            | 0.00145     | 0.171870313 | PTW/PP1 phosphatase complex                                                         |
| Europe            | 0.00148     | 0.171870313 | localization                                                                        |
| Europe            | 0.0015      | 0.171870313 | response to reactive oxygen species                                                 |
| Europe            | 0.0015      | 0.171870313 | determination of left/right symmetry                                                |
| Europe            | 0.00174     | 0.192166471 | cleavage furrow                                                                     |
| Europe            | 0.00178     | 0.192166471 | hydrogen peroxide metabolic process                                                 |
| East Asia         | 0.00004     | 0.11411     | regulation of peroxisome proliferator activated receptor signaling pathway          |
| East Asia         | 0.00013     | 0.151273333 | pyruvate dehydrogenase (acetyl-transferring) kinase activity                        |
| East Asia         | 0.00025     | 0.151273333 | negative regulation of intestinal cholesterol absorption                            |
| East Asia         | 0.00025     | 0.151273333 | regulation of intestinal cholesterol absorption                                     |
| East Asia         | 0.00025     | 0.151273333 | negative regulation of intestinal phytosterol absorption                            |
| East Asia         | 0.00028     | 0.151273333 | negative regulation of peroxisome proliferator activated receptor signaling pathway |
| Eurasia           | 0.00001     | 0.0272      | RNA polymerase II core promoter proximal region sequence-specific DNA binding       |
| Eurasia           | 0.00003     | 0.042205    | transcription factor activity involved in negative regulation of transcription      |
| Eurasia           | 0.00003     | 0.042205    | RNA polymerase II transcription regulatory region sequence-specific DNA binding     |
| Eurasia           | 0.00003     | 0.042205    | transcription factor activity involved in negative regulation of transcription      |

**Table 6. Top hits for 3P-CLR run on the ancestral branch to Eurasians and Africans, using archaic humans as the outgroup.** We show the windows in the top 99.9% quantile of scores. Windows were merged together if they were contiguous. Win max = Location of window with maximum score. Win start = left-most end of left-most window for each region. Win end = right-most end of right-most window for each region. All positions were rounded to the nearest 100 bp. Score max = maximum score within region.

| chr | Win max   | Win start | Win end   | Score max | Genes within region                                                                                                                                                                                                                       |
|-----|-----------|-----------|-----------|-----------|-------------------------------------------------------------------------------------------------------------------------------------------------------------------------------------------------------------------------------------------|
| 21  | 34916200  | 34737300  | 35222100  | 868.062   | IFNGR2, TMEM50B, DNAJC28, GART, SON, DONSON, CRYZL1, ITSN1                                                                                                                                                                                |
| 17  | 56595700  | 56373200  | 57404800  | 846.821   | BZRAP1, SUPT4H1, RNF43, HSF5, MTMR4, SEPT4, C17orf47, TEX14, RAD51C, PPM1E, TRIM37, SKA2, PRR11, SMG8, GSDPD1                                                                                                                             |
| 12  | 79919700  | 79756800  | 80109400  | 840.098   | SYT1, PAWR                                                                                                                                                                                                                                |
| 14  | 71790600  | 71658900  | 72283600  | 835.723   | SIPA1L1                                                                                                                                                                                                                                   |
| 12  | 116589000 | 116366000 | 116760000 | 826.65    | MED13L                                                                                                                                                                                                                                    |
| 2   | 37989300  | 37917400  | 38021500  | 823.495   | CDC42EP3                                                                                                                                                                                                                                  |
| 3   | 36941700  | 36836900  | 37517500  | 819.361   | TRANK1, EPM2AIP1, MLH1, LRRFIP2, GOLGA4, C3orf35, ITGA9                                                                                                                                                                                   |
| 14  | 29635300  | 29222200  | 29696100  | 813.978   | FOXG1                                                                                                                                                                                                                                     |
| 5   | 86911000  | 86463700  | 87101400  | 811.741   | RASA1, CCNH                                                                                                                                                                                                                               |
| 1   | 213498000 | 213145000 | 213561000 | 810.015   | VASH2, ANGEL2, RPS6KC1                                                                                                                                                                                                                    |
| 2   | 156468000 | 155639000 | 156764000 | 809.474   | KCNJ3                                                                                                                                                                                                                                     |
| 4   | 146155000 | 145355000 | 146222000 | 806.198   | HHIP, ANAPC10, ABCE1, OTUD4                                                                                                                                                                                                               |
| 7   | 121700000 | 121620000 | 122369000 | 794.997   | PTPRZ1, AASS, FEZF1, CADPS2, RNF133, RNF148                                                                                                                                                                                               |
| 17  | 61237300  | 60906000  | 61544500  | 793.984   | TANC2, CYB561                                                                                                                                                                                                                             |
| 7   | 107229000 | 106639000 | 107308000 | 784.544   | PRKAR2B, HBP1, COG5, GPR22, DUS4L, BCAP29, SLC26A4                                                                                                                                                                                        |
| 3   | 50576000  | 50177100  | 51929300  | 778.276   | SEMA3F, GNAT1, GNAT2, LSMEM2, IFRD2, HYAL3, NAT6, HYAL1, HYAL2, TUSC2, RASSF1, ZMYND10, NPRL2, CYB561D2, TMEM115, CACNA2D2, C3orf18, HEMK1, CISH, MAPKAPK3, DOCK3, MANF, RBM15B, RAD54L2, TEX264, GRM2, IQCF6, IQCF3, IQCF2, IQCF5, IQCF1 |
| 5   | 93214400  | 92677500  | 93645500  | 772.879   | NR2F1, FAM172A, POU5F2, KIAA0825                                                                                                                                                                                                          |
| 7   | 99167000  | 98722100  | 99375300  | 764.946   | ZSCAN25, CYP3A5, CYP3A7, CYP3A4, SMURF1, KPNA7, ARPC1A, ARPC1B, PDAP1, BUD31, PTCD1, ATP5J2-PTCD1, CPSP4, ATP5J2, ZNF789, ZNF394, ZKSCAN5, FAM200A, ZNF655                                                                                |
| 21  | 36769600  | 36689700  | 36842100  | 764.846   | RUNX1                                                                                                                                                                                                                                     |
| 13  | 96782600  | 96180700  | 97420500  | 759.296   | CLDN10, DZIP1, DNAJC3, UGGT2, HS6ST3                                                                                                                                                                                                      |
| 1   | 176411000 | 175890000 | 176437000 | 758.886   | RFWD2, PAPA2                                                                                                                                                                                                                              |
| 15  | 49269100  | 49247500  | 50036600  | 758.119   | SECISBP2L, COPS2, GALK2, FAM227B, FGF7, DTWD1, SHC4                                                                                                                                                                                       |
| 22  | 40521100  | 40350900  | 41223300  | 757.637   | GRAP2, FAM83F, TNRC6B, ADSL, SGSM3, MKL1, MCHR1, SLC25A17, ST13                                                                                                                                                                           |
| 9   | 125562000 | 125505000 | 126059000 | 755.506   | ZBTB26, RABGAP1, GPR21, STRBP, OR1L6, OR5C1, PDCL, OR1K1, RC3H2, ZBTB6                                                                                                                                                                    |
| 5   | 89579400  | 89413800  | 89654700  | 755.236   | -                                                                                                                                                                                                                                         |
| 19  | 19313800  | 19100800  | 19788800  | 755.007   | SUGP2, ARMC6, SLC25A42, TMEM161A, MEF2BNB, MEF2B, MEF2C, MEF2D, RFXANK, NR2C2AP, NCAN, HAPLN4, TM6SF2, SUGP1, MAU2, GATAD2A, TSSK6, NDUF13, YJEFN3, CILP2, PBX4, LPAR2, GMIP, ATP13A1, ZNF101                                             |
| 2   | 63889800  | 62767900  | 64394800  | 753.877   | EHBPI, OTX1, WPCP, MDH1, UGP2, VPS54, PELI1                                                                                                                                                                                               |
| 2   | 73506800  | 73482800  | 74054300  | 749.705   | FBXO41, EGR4, ALMS1, NAT8, TPRKB, DUSP11, C2orf78                                                                                                                                                                                         |
| 1   | 66833100  | 66772600  | 66952600  | 745.941   | PDE4B                                                                                                                                                                                                                                     |
| 4   | 46634200  | 46361400  | 46994100  | 743.893   | GABRA2, COX7B2, GABRA4                                                                                                                                                                                                                    |
| 3   | 110709000 | 110513000 | 110932000 | 739.819   | PVRL3                                                                                                                                                                                                                                     |
| 5   | 50148300  | 44575900  | 50411900  | 737.793   | MRPS30, HCN1, EMB, PARP8                                                                                                                                                                                                                  |
| 2   | 145109000 | 144689000 | 145219000 | 736.476   | CTDC1, ZEB2                                                                                                                                                                                                                               |
| 13  | 44935700  | 44887400  | 45237200  | 736.039   | SERP2, TSC22D1                                                                                                                                                                                                                            |
| 11  | 65212900  | 65129200  | 65379700  | 734.241   | KCNK7, MAP3K11, SLC25A45, FRMD8, SCYL1, LTBP3, SSSCA1, FAM89B, EHBPI1, PKIA                                                                                                                                                               |
| 8   | 79211300  | 78656900  | 79554100  | 734.157   | -                                                                                                                                                                                                                                         |
| 4   | 22923300  | 22826000  | 23196800  | 733.814   | FLVCR2, TTLL5, C14orf1, IFT43, TGFB3                                                                                                                                                                                                      |
| 14  | 76101700  | 76054700  | 76450300  | 733.155   | RAB28                                                                                                                                                                                                                                     |
| 4   | 13346700  | 13142500  | 13533100  | 732.271   | NEDD1                                                                                                                                                                                                                                     |
| 12  | 97334600  | 96828100  | 97424100  | 729.578   | TRPC7                                                                                                                                                                                                                                     |
| 5   | 135849000 | 135588000 | 136038000 | 724.441   | KIF17, SH2D5, HP1BP3, EIF4G3, ECE1                                                                                                                                                                                                        |
| 1   | 21083000  | 21012100  | 21629100  | 724.414   | DDIT4, DNAJB12, MICU1, MCU, OIT3, PLA2G12B, P4HA1, NUDT13, ECD, FAM149B1, DNAJC9, MRPS16, TTC18, ANXA7, MSS51, PPP3CB, USP54, MYOZ1                                                                                                       |
| 10  | 74730800  | 74007800  | 75399900  | 723.785   | ZIC4, ZIC1                                                                                                                                                                                                                                |
| 2   | 201156000 | 200636000 | 201355000 | 720.454   | C2orf69, TYW5, C2orf47, SPATS2L, KCTD18                                                                                                                                                                                                   |
| 3   | 147223000 | 146941000 | 147360000 | 719.916   | SLC12A2, FBN2                                                                                                                                                                                                                             |
| 5   | 127571000 | 127254000 | 127734000 | 712.643   | ELAVL2                                                                                                                                                                                                                                    |
| 9   | 23839000  | 23717700  | 24073800  | 711.977   | -                                                                                                                                                                                                                                         |



**Table 7. Enriched GO categories in the Modern Human branch.** We tested for ontology enrichment among the regions in the 99.5% quantile of the 3P-CLR scores corresponding to the Modern Human branch after the split from archaic humans ( $P < 0.05$ ,  $FDR < 0.2$ ).

| Population Branch | Raw p-value | FDR         | GO category                                                        |
|-------------------|-------------|-------------|--------------------------------------------------------------------|
| Modern Human      | 0.00006     | 0.100843    | B cell chemotaxis                                                  |
| Modern Human      | 0.00011     | 0.100843    | histone H4 acetylation                                             |
| Modern Human      | 0.00012     | 0.100843    | transcription, DNA-templated                                       |
| Modern Human      | 0.00015     | 0.100843    | RNA biosynthetic process                                           |
| Modern Human      | 0.00025     | 0.100843    | heterocycle biosynthetic process                                   |
| Modern Human      | 0.00028     | 0.100843    | aromatic compound biosynthetic process                             |
| Modern Human      | 0.00028     | 0.100843    | regulation of cell proliferation in bone marrow                    |
| Modern Human      | 0.00028     | 0.100843    | positive regulation of cell proliferation in bone marrow           |
| Modern Human      | 0.0003      | 0.100843    | cellular nitrogen compound biosynthetic process                    |
| Modern Human      | 0.00031     | 0.100843    | nucleobase-containing compound biosynthetic process                |
| Modern Human      | 0.00049     | 0.138157692 | organic cyclic compound biosynthetic process                       |
| Modern Human      | 0.00052     | 0.138157692 | lymphocyte chemotaxis                                              |
| Modern Human      | 0.00055     | 0.138157692 | cellular macromolecule biosynthetic process                        |
| Modern Human      | 0.00063     | 0.144245625 | RNA metabolic process                                              |
| Modern Human      | 0.00069     | 0.144245625 | regulation of cell cycle                                           |
| Modern Human      | 0.0007      | 0.144245625 | activation of Rap GTPase activity                                  |
| Modern Human      | 0.00078     | 0.146167222 | negative regulation of cell cycle process                          |
| Modern Human      | 0.0008      | 0.146167222 | regulation of organelle organization                               |
| Modern Human      | 0.00099     | 0.149766452 | germinal center formation                                          |
| Modern Human      | 0.00103     | 0.149766452 | regulation of cytoskeleton organization                            |
| Modern Human      | 0.00106     | 0.149766452 | mitotic spindle assembly checkpoint                                |
| Modern Human      | 0.0011      | 0.149766452 | nuclear division                                                   |
| Modern Human      | 0.00114     | 0.149766452 | negative regulation of mitotic metaphase/anaphase transition       |
| Modern Human      | 0.00114     | 0.149766452 | negative regulation of metaphase/anaphase transition of cell cycle |
| Modern Human      | 0.00115     | 0.149766452 | leucine zipper domain binding                                      |
| Modern Human      | 0.00124     | 0.149766452 | mitotic spindle checkpoint                                         |
| Modern Human      | 0.00126     | 0.149766452 | spindle assembly checkpoint                                        |
| Modern Human      | 0.00135     | 0.149766452 | cell cycle process                                                 |
| Modern Human      | 0.00139     | 0.149766452 | negative regulation of molecular function                          |
| Modern Human      | 0.0014      | 0.149766452 | anaphase-promoting complex                                         |
| Modern Human      | 0.00142     | 0.149766452 | mitosis                                                            |
| Modern Human      | 0.00151     | 0.1552175   | spindle checkpoint                                                 |
| Modern Human      | 0.00162     | 0.158729118 | lymphocyte migration                                               |
| Modern Human      | 0.00162     | 0.158729118 | intra-Golgi vesicle-mediated transport                             |
| Modern Human      | 0.00181     | 0.167352222 | establishment or maintenance of monopolar cell polarity            |
| Modern Human      | 0.00181     | 0.167352222 | establishment of monopolar cell polarity                           |
| Modern Human      | 0.00192     | 0.171855135 | mitotic anaphase                                                   |
| Modern Human      | 0.00208     | 0.177203721 | mitotic cell cycle                                                 |
| Modern Human      | 0.00216     | 0.177203721 | negative regulation of cell cycle                                  |
| Modern Human      | 0.00222     | 0.177203721 | establishment of protein localization to Golgi                     |
| Modern Human      | 0.00222     | 0.177203721 | protein targeting to Golgi                                         |
| Modern Human      | 0.00231     | 0.177203721 | anaphase                                                           |
| Modern Human      | 0.00234     | 0.177203721 | myeloid cell differentiation                                       |
| Modern Human      | 0.00255     | 0.179768044 | negative regulation of mitosis                                     |
| Modern Human      | 0.00257     | 0.179768044 | histone H4-K5 acetylation                                          |
| Modern Human      | 0.00257     | 0.179768044 | histone H4-K8 acetylation                                          |
| Modern Human      | 0.00279     | 0.188911458 | organelle fission                                                  |
| Modern Human      | 0.00284     | 0.188911458 | nucleobase-containing compound metabolic process                   |
| Modern Human      | 0.003       | 0.1893844   | regulation of metaphase/anaphase transition of cell cycle          |
| Modern Human      | 0.003       | 0.1893844   | regulation of mitotic metaphase/anaphase transition                |

**Table 8. Overlap between GWAS catalog and catalog of modern human-specific high-frequency changes in the top modern human selected regions.** Chr = chromosome. Pos = position (hg19). ID = SNP rs ID. Hum = Present-day human major allele. Anc = Human-Chimpanzee ancestor allele. Arch = Archaic human allele states (Altai Neanderthal, Denisova) where H=human-like allele and A=ancestral allele. Freq = present-day human derived frequency. Cons = consequence. C = C-score. PubMed = PubMed article ID for GWAS study.

| Chr | Pos       | ID         | Hum | Anc | Arch    | Freq | Gene          | Cons            | C     | GWAS trait                                                | PubMed    |
|-----|-----------|------------|-----|-----|---------|------|---------------|-----------------|-------|-----------------------------------------------------------|-----------|
| 2   | 64279606  | rs10171434 | C   | T   | A/A,A/A | 0.92 | NA            | regulatory      | 8.358 | Suicide attempts in bipolar disorder                      | 21041247  |
| 2   | 64279606  | rs10171434 | C   | T   | A/A,A/A | 0.92 | NA            | regulatory      | 8.358 | Urinary metabolites                                       | 21572414  |
| 2   | 144783214 | rs16823411 | T   | C   | A/A,A/A | 0.93 | GTDC1         | intron          | 4.112 | Body mass index                                           | 21701565  |
| 2   | 144783214 | rs16823411 | T   | C   | A/A,A/A | 0.93 | GTDC1         | intron          | 4.112 | Body mass index                                           | 21701565  |
| 2   | 145213638 | rs731108   | G   | C   | A/A,H/H | 0.92 | ZEB2          | regulatory      | 10.31 | Renal cell carcinoma                                      | 23184150  |
| 2   | 156506516 | rs4407211  | C   | T   | A/A,A/A | 0.92 | NA            | intergenic      | 1.348 | Alcohol consumption                                       | 23953852  |
| 3   | 51142359  | rs4286453  | T   | C   | A/A,A/A | 0.91 | DOCK3         | intron          | 4.96  | Multiple complex diseases                                 | 17554300  |
| 3   | 51824167  | rs6796373  | G   | C   | A/A,A/A | 0.94 | NA            | intergenic      | 1.381 | Response to taxane treatment (placitaxel)                 | 23006423  |
| 3   | 147200492 | rs9876193  | G   | A   | H/H,A/A | 0.95 | ZIC1          | intron,nc       | 6.856 | Type 2 diabetes                                           | 17463246  |
| 4   | 13325741  | rs2867467  | G   | C   | A/A,A/A | 0.91 | NA            | intergenic      | 0.476 | Obesity (extreme)                                         | 21935397  |
| 4   | 13328373  | rs6842438  | T   | C   | A/A,A/A | 0.92 | NA            | intergenic      | 5.241 | Obesity (extreme)                                         | 21935397  |
| 4   | 13330095  | rs10019897 | C   | T   | A/A,A/A | 0.92 | NA            | upstream        | 1.472 | Multiple complex diseases                                 | 17554300  |
| 4   | 13330095  | rs10019897 | C   | T   | A/A,A/A | 0.92 | NA            | upstream        | 1.472 | Obesity (extreme)                                         | 21935397  |
| 4   | 13333413  | rs9996364  | A   | G   | A/A,A/A | 0.92 | HSP90AB2P     | upstream        | 5.865 | Obesity (extreme)                                         | 21935397  |
| 4   | 13338465  | rs11945340 | C   | T   | A/A,A/A | 0.92 | HSP90AB2P     | non coding exon | 12.04 | Obesity (extreme)                                         | 21935397  |
| 4   | 13340249  | rs6839621  | T   | C   | A/A,A/A | 0.92 | HSP90AB2P     | non coding exon | 0.074 | Obesity (extreme)                                         | 21935397  |
| 4   | 13346602  | rs11930614 | C   | T   | A/A,A/A | 0.92 | NA            | intergenic      | 0.587 | Obesity (extreme)                                         | 21935397  |
| 4   | 13350973  | rs10021881 | T   | C   | A/A,A/A | 0.92 | NA            | regulatory      | 3.032 | Obesity (extreme)                                         | 21935397  |
| 4   | 13356393  | rs16888596 | G   | A   | A/A,A/A | 0.94 | NA            | intergenic      | 2.344 | Obesity (extreme)                                         | 21935397  |
| 4   | 13357274  | rs11732938 | A   | G   | A/A,A/A | 0.94 | NA            | intergenic      | 15.45 | Obesity (extreme)                                         | 21935397  |
| 4   | 13360622  | rs11947529 | T   | A   | A/A,A/A | 0.93 | RAB28         | downstream      | 4.356 | Obesity (extreme)                                         | 21935397  |
| 4   | 13363958  | rs12331157 | A   | G   | A/A,A/A | 0.97 | RAB28         | intron          | 1.3   | Obesity (extreme)                                         | 21935397  |
| 4   | 13363974  | rs12332023 | C   | T   | A/A,A/A | 0.97 | RAB28         | intron          | 0.75  | Obesity (extreme)                                         | 21935397  |
| 4   | 13366481  | rs7673680  | C   | T   | A/A,A/A | 0.93 | RAB28         | downstream      | 4.16  | Obesity (extreme)                                         | 21935397  |
| 4   | 13370308  | rs10003958 | T   | C   | A/A,A/A | 0.93 | RAB28         | regulatory      | 16.58 | Obesity (extreme)                                         | 21935397  |
| 4   | 13373583  | rs999851   | C   | T   | A/A,A/A | 0.97 | RAB28         | intron          | 1.305 | Obesity (extreme)                                         | 21935397  |
| 4   | 13374462  | rs9291610  | G   | A   | A/A,A/A | 0.93 | RAB28         | intron          | 3.264 | Obesity (extreme)                                         | 21935397  |
| 4   | 13393897  | rs9998914  | A   | T   | A/A,A/A | 0.96 | RAB28         | intron          | 0.414 | Obesity (extreme)                                         | 21935397  |
| 4   | 13403855  | rs11943295 | G   | A   | A/A,A/A | 0.94 | RAB28         | intron          | 1.702 | Multiple complex diseases                                 | 17554300  |
| 4   | 13403855  | rs11943295 | G   | A   | A/A,A/A | 0.94 | RAB28         | intron          | 1.702 | Obesity (extreme)                                         | 21935397  |
| 4   | 13403998  | rs11943330 | G   | A   | A/A,A/A | 0.93 | RAB28         | intron          | 3.295 | Obesity (extreme)                                         | 21935397  |
| 4   | 13404130  | rs7677336  | G   | T   | A/A,A/A | 0.94 | RAB28         | intron          | 0.752 | Obesity (extreme)                                         | 21935397  |
| 4   | 13404717  | rs7677332  | A   | C   | A/A,A/A | 0.93 | RAB28         | intron          | 0.702 | Obesity (extreme)                                         | 21935397  |
| 4   | 13440031  | rs11737264 | C   | G   | A/A,A/A | 0.93 | RAB28         | intron          | 1.159 | Obesity (extreme)                                         | 21935397  |
| 4   | 13440271  | rs11737360 | C   | T   | A/A,A/A | 0.94 | RAB28         | intron          | 2.745 | Obesity (extreme)                                         | 21935397  |
| 4   | 13449532  | rs16888654 | A   | C   | A/A,A/A | 0.94 | RAB28         | intron          | 0.46  | Obesity (extreme)                                         | 21935397  |
| 4   | 13452022  | rs16888661 | C   | A   | A/A,A/A | 0.91 | RAB28         | intron          | 5.359 | Obesity (extreme)                                         | 21935397  |
| 4   | 13463991  | rs11933841 | T   | C   | A/A,A/A | 0.93 | RAB28         | intron          | 4.193 | Obesity (extreme)                                         | 21935397  |
| 4   | 13465710  | rs11947665 | T   | A   | A/A,A/A | 0.93 | RAB28         | intron          | 4.41  | Obesity (extreme)                                         | 21935397  |
| 4   | 23095293  | rs6825402  | C   | T   | A/A,A/A | 0.96 | NA            | intergenic      | 2.599 | Multiple complex diseases                                 | 17554300  |
| 5   | 45393261  | rs6874279  | G   | A   | A/A,A/A | 0.93 | HCN1          | intron          | 1.47  | Alcohol dependence                                        | 20201924  |
| 5   | 45393261  | rs6874279  | G   | A   | A/A,A/A | 0.93 | HCN1          | intron          | 1.47  | Alcoholism                                                | pha002891 |
| 5   | 89540468  | rs2935504  | C   | T   | A/A,A/A | 0.97 | RP11-61G23.1  | non coding exon | 4.52  | Multiple complex diseases                                 | 17554300  |
| 7   | 106720932 | rs12154324 | G   | A   | A/A,A/A | 0.93 | NA            | regulatory      | 5.411 | Multiple complex diseases                                 | 17554300  |
| 13  | 44978167  | rs9525954  | C   | A   | A/A,A/A | 0.95 | RP11-269C23.3 | intron          | 2.731 | Type 2 diabetes                                           | 17463246  |
| 13  | 45034814  | rs9533862  | G   | C   | A/A,A/A | 0.93 | FILIP1LP1     | intron          | 2.026 | Suicide attempts in bipolar disorder                      | 21041247  |
| 13  | 45055091  | rs17065868 | T   | C   | A/A,A/A | 0.92 | FILIP1LP1     | intron          | 3.214 | Antineutrophil cytoplasmic antibody-associated vasculitis | 22808956  |

# Figures

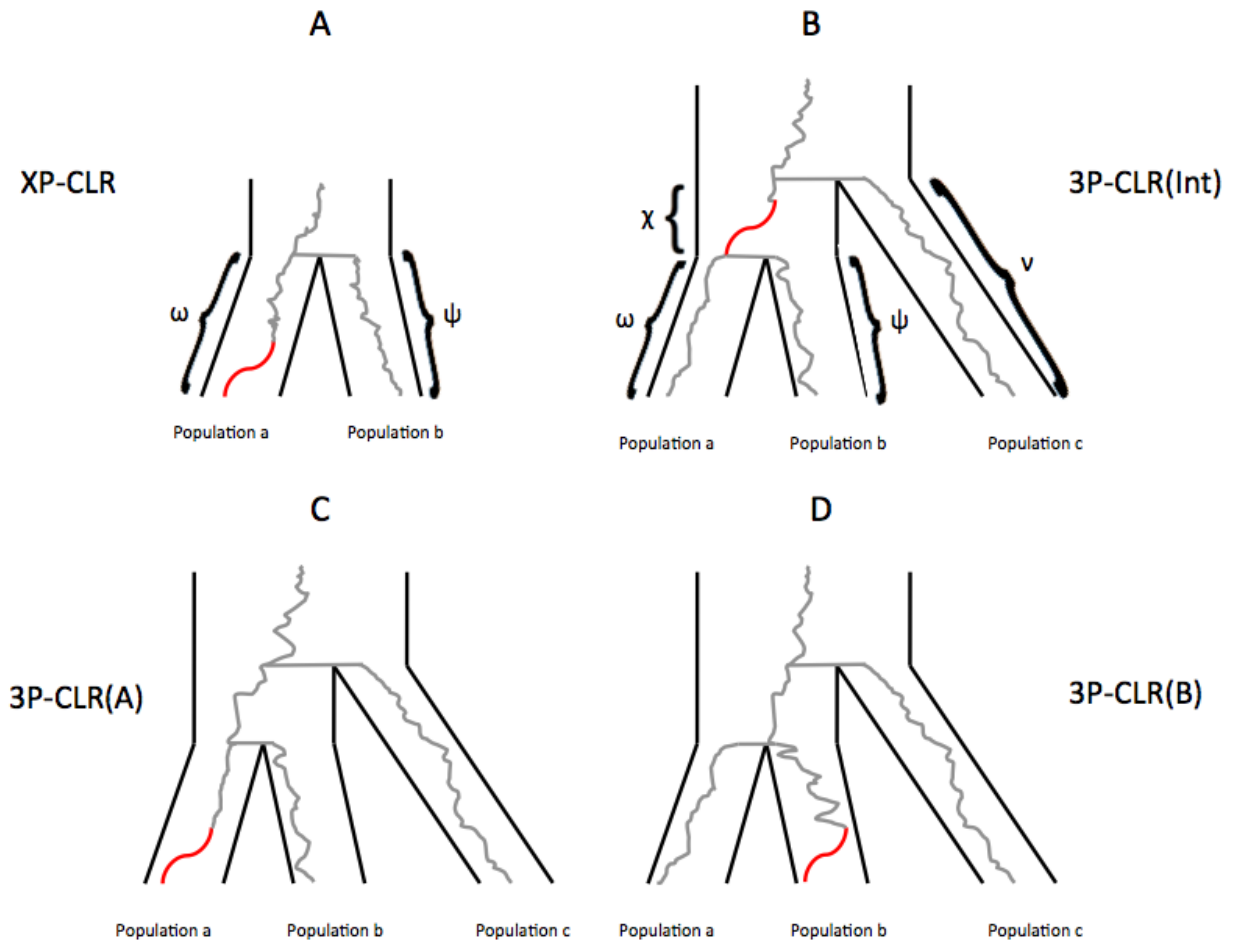

**Figure 1. Schematic tree of selective sweeps detected by XP-CLR and 3P-CLR.** While XP-CLR can only use two populations (an outgroup and a test) to detect selection (panel A), 3P-CLR can detect selection in the ancestral branch of two populations (3P-CLR(Int), panel B) or on the branches specific to each population (3P-CLR(A) and 3P-CLR(B), panels C and D, respectively). The greek letters denote the known drift times for each branch of the population tree.

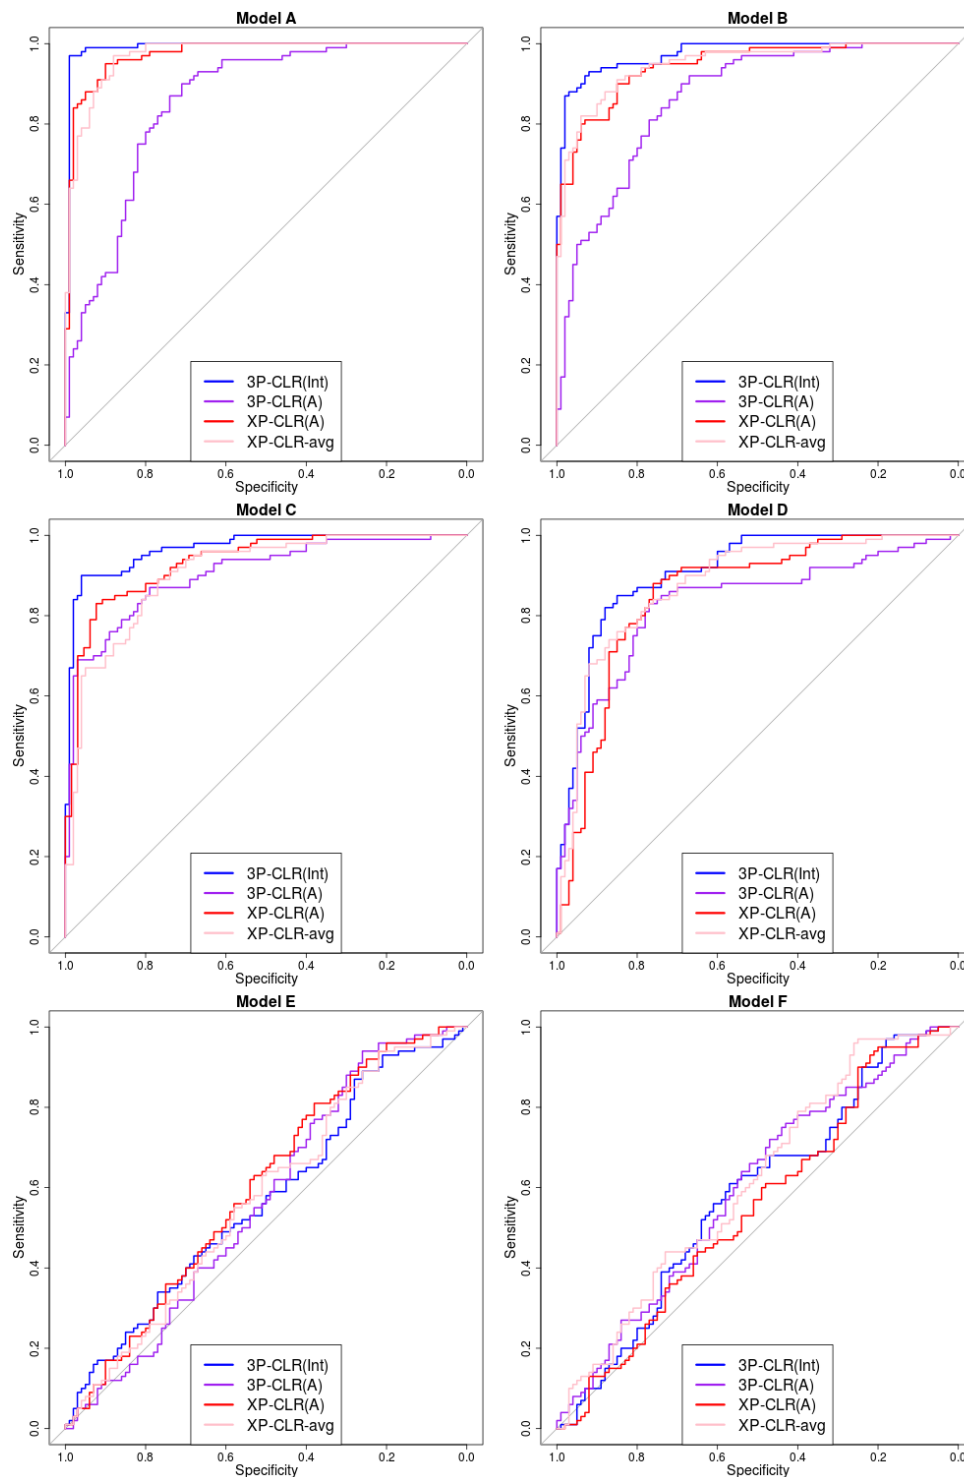

**Figure 2.** ROC curves for performance of 3P-CLR(Int), 3P-CLR(A) and two variants of XP-CLR in detecting selective sweeps that occurred before the split of two populations *a* and *b*, under different demographic models. In this case, the outgroup panel from population *c* contained 100 haploid genomes. The two sister population panels (from *a* and *b*) also have 100 haploid genomes each.

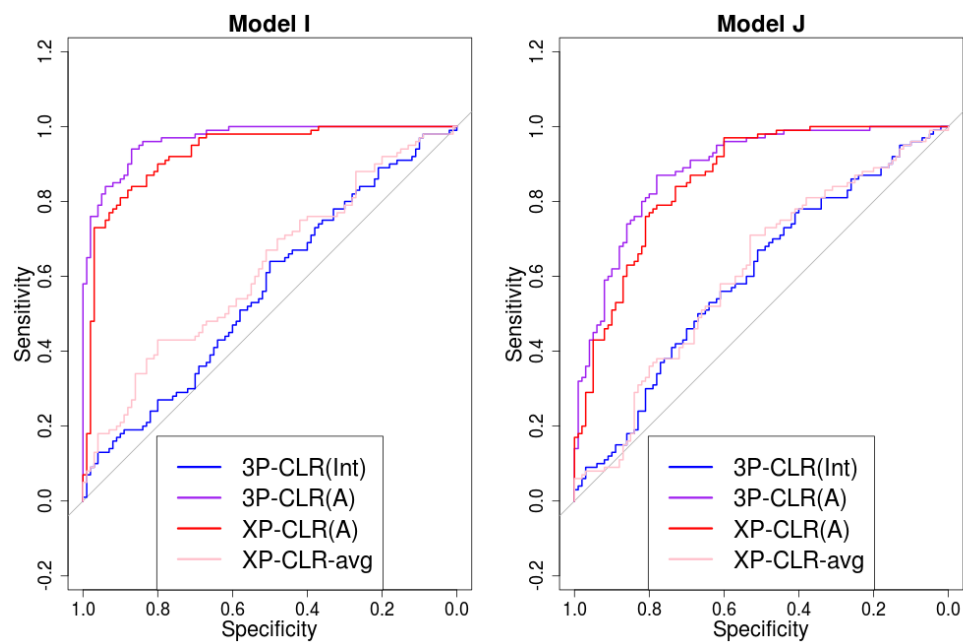

**Figure 3.** 3P-CLR(Int) is tailored to detect selective events that happened before the split  $t_{ab}$ , so it is largely insensitive to sweeps that occurred after the split. ROC curves show performance of 3P-CLR(Int) and two variants of XP-CLR for models where selection occurred in population  $a$  after its split from  $b$ .

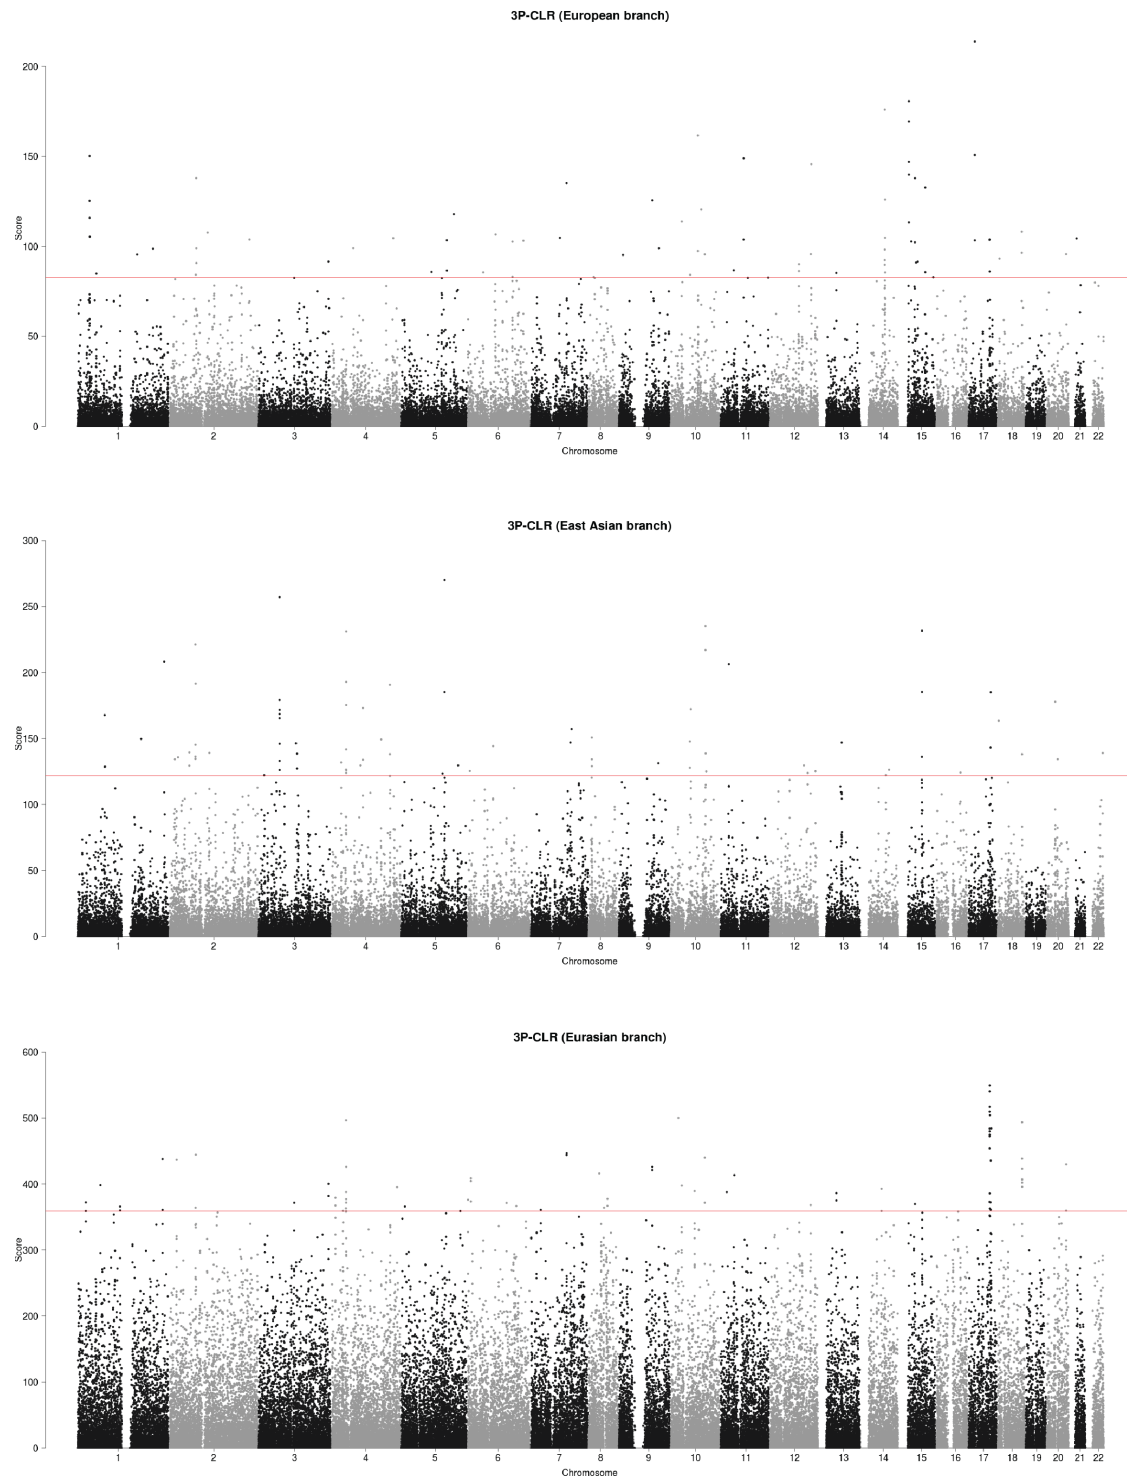

**Figure 4. 3P-CLR scan of Europeans (upper panel), East Asians (middle panel) and the ancestral population to Europeans and East Asians (lower panel), using Africans as the outgroup in all 3 cases. The red line denotes the 99.9% quantile cutoff.**

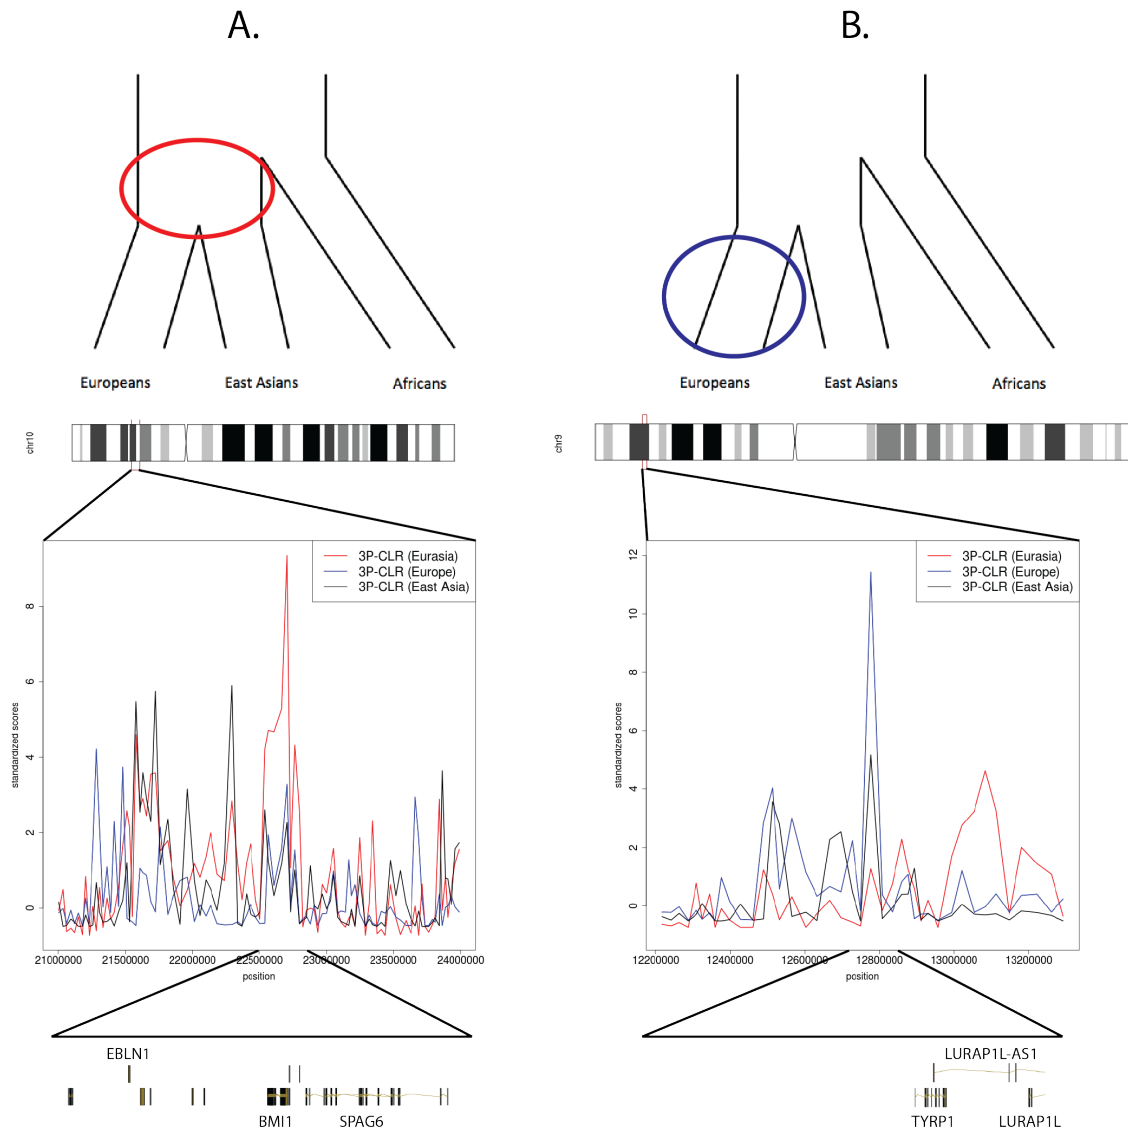

**Figure 5. 3P-CLR scan of Europeans (blue), East Asians (black) and the ancestral Eurasian population (red) reveals regions under selection in different branches of the population tree.** To make a fair comparison, all 3P-CLR scores were standardized by subtracting the chromosome-wide mean from each window and dividing the resulting score by the chromosome-wide standard deviation. A) The region containing genes *SPAG6* and *BMI1* is a candidate for selection in the ancestral population of Europeans and East Asians. B) The region containing *TYRP1* is a candidate for selection in the European population. The image was built using the GenomeGraphs package in Bioconductor.

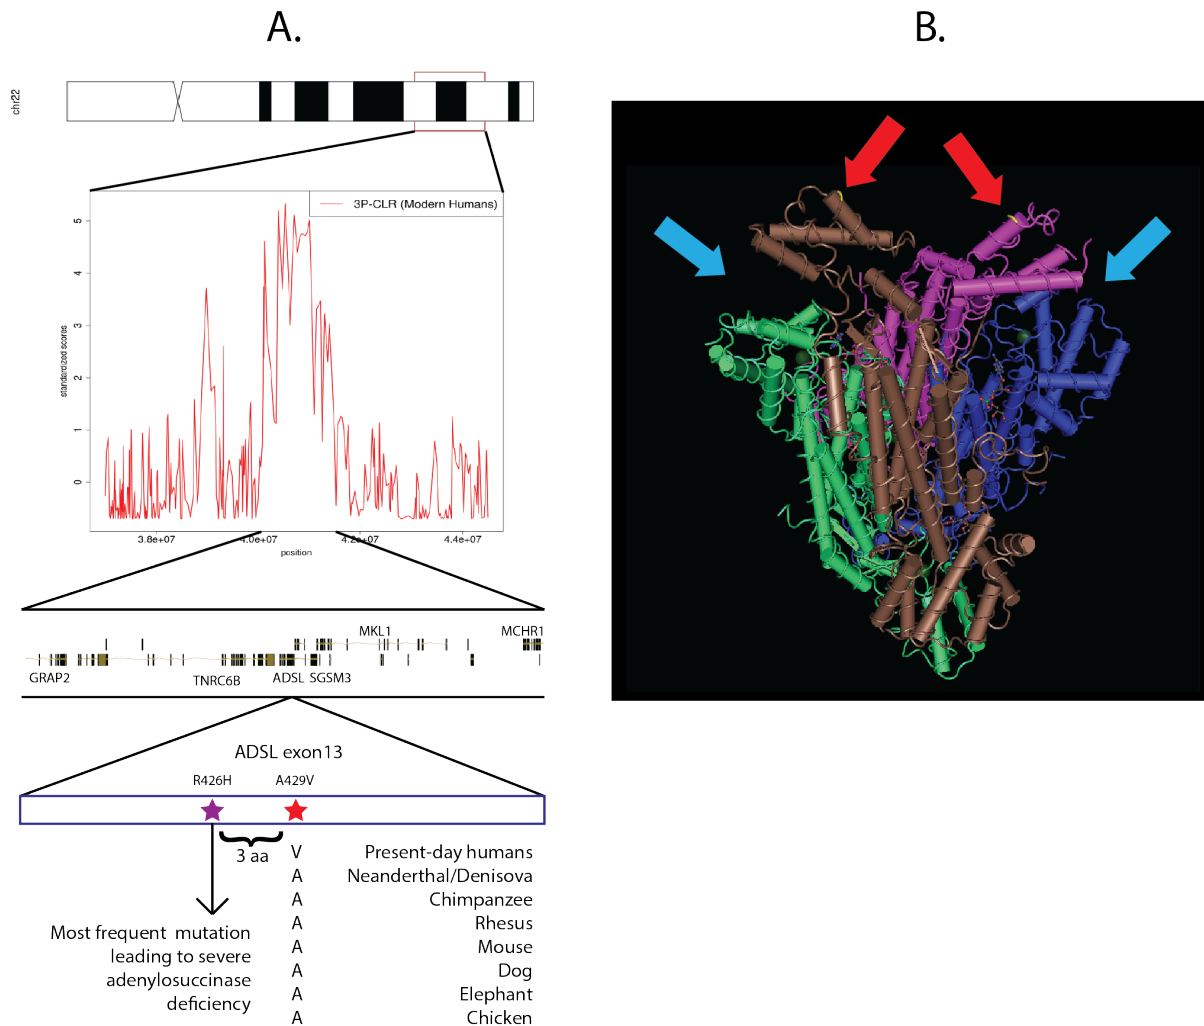

**Figure 6. ADSL is a candidate for selection in the modern human lineage, after the split from Neanderthal and Denisova.** A) One of the top-scoring regions when running 3P-CLR on the modern human lineage contains genes *TNRC6B*, *ADSL*, *MKL1*, *MCHR1*, *SGSM3* and *GRAP2*. The most disruptive nonsynonymous modern-human-specific change in the entire list of top regions is in an exon of *ADSL* and is fixed derived in all present-day humans but ancestral in archaic humans. It is highly conserved across tetrapods and lies only 3 residues away from the most common mutation leading to severe adenylosuccinase deficiency. B) The *ADSL* gene codes for a tetrameric protein. The mutation is in the C-terminal domain of each tetrameric unit (red arrows), which are near the active sites (light blue arrows). Scores in panel A were standardized using the chromosome-wide mean and standard deviation. Vertebrate alignments were obtained from the UCSC genome browser (Vertebrate Multiz Alignment and Conservation track) and the image was built using the GenomeGraphs package in Bioconductor and Cn3D.



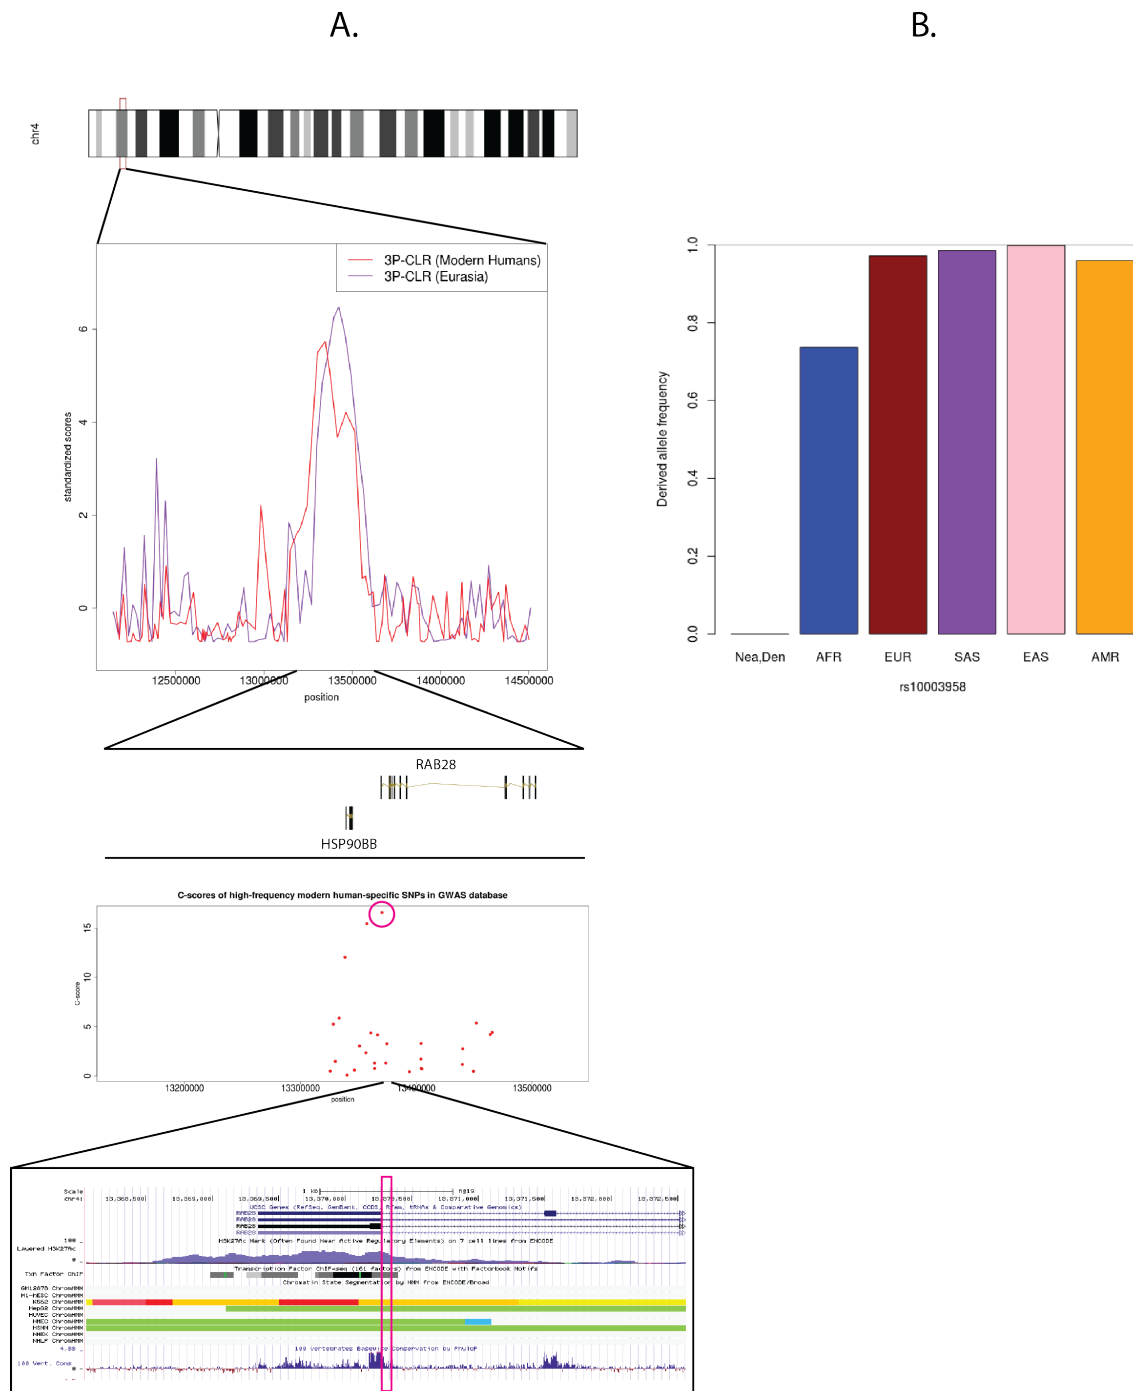

**Figure 7. *RAB28* is a candidate for selection in both the Eurasian and the modern human ancestral lineages.** A) The gene lies in the middle of a 3P-CLR peak for both ancestral populations. The putatively selected region also contains several SNPs that are significantly associated with obesity and that are high-frequency derived in present-day humans (> 93%) but ancestral in archaic humans (red dots). The SNP with the highest C-score among these (rs10003958, pink circle) lies in a highly conserved strong enhancer region adjacent to the last exon of the gene. Color code for ChromHMM segmentation regions in UCSC genome browser: red = promoter, orange = strong enhancer, yellow = weak enhancer, green = weak transcription, blue = insulator. The image was built using the GenomeGraphs package in Bioconductor and the UCSC Genome Browser. B) Derived allele frequencies of SNP rs10003958 in the Denisova and Neanderthal genomes, and in different 1000 Genomes continental populations. AFR = Africans. AMR = Native Americans. SAS = South Asians. EUR = Europeans. EAS = East Asians.

## 671 Supplementary Figures

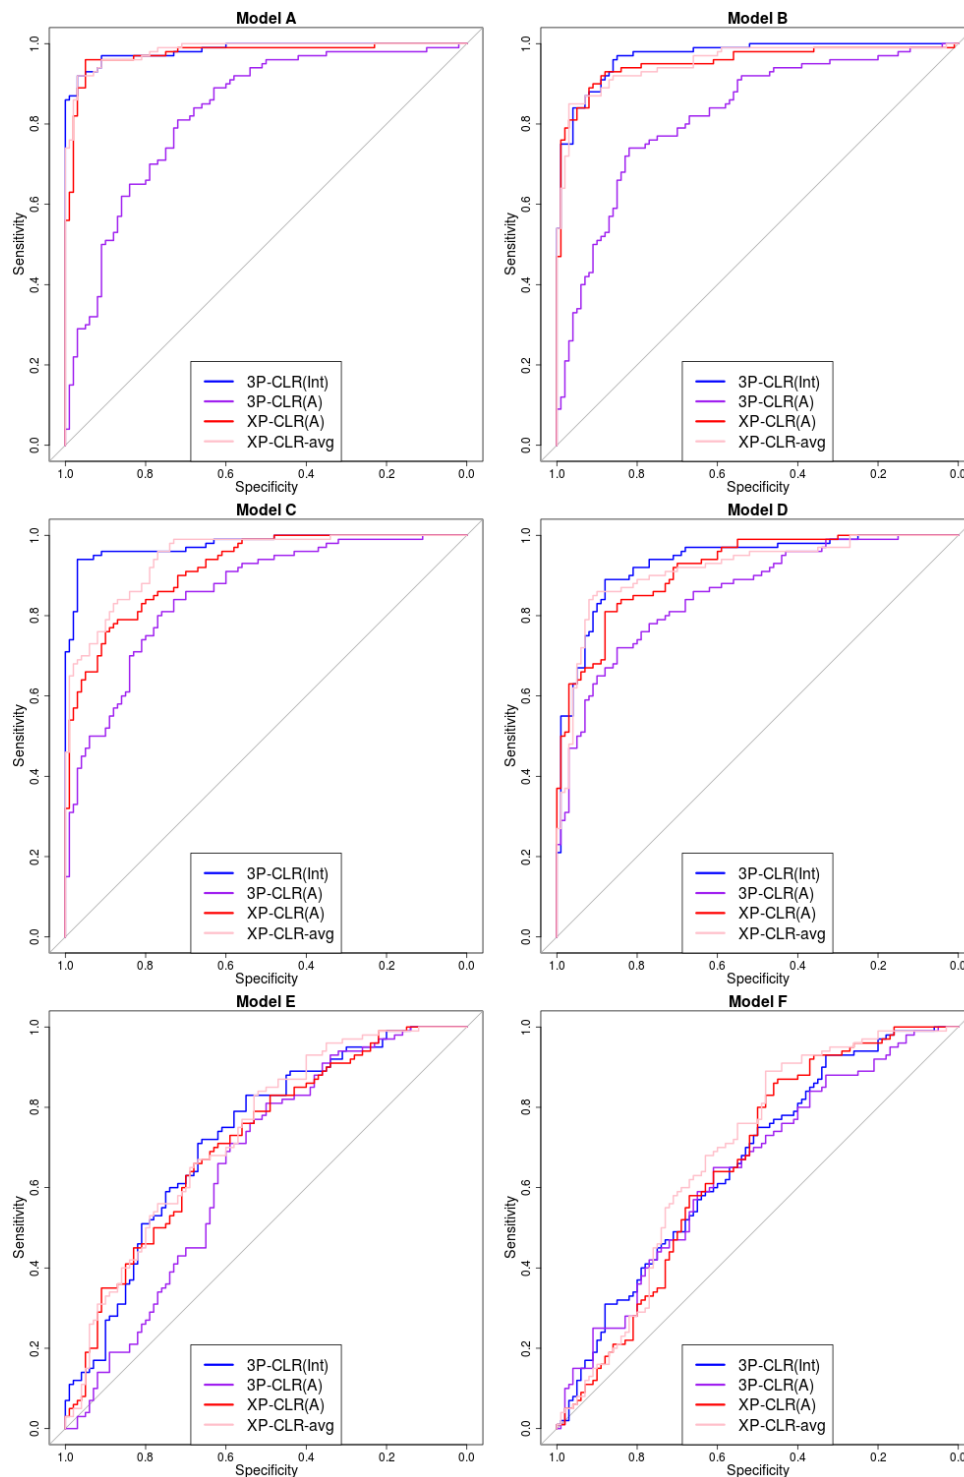

**Figure S1.** ROC curves for performance of 3P-CLR(Int), 3P-CLR(A) and two variants of XP-CLR in detecting selective sweeps that occurred before the split of two populations *a* and *b*, under different demographic models. In this case, the outgroup panel from population *c* contained 10 haploid genomes. The two sister population panels (from *a* and *b*) have 100 haploid genomes each.

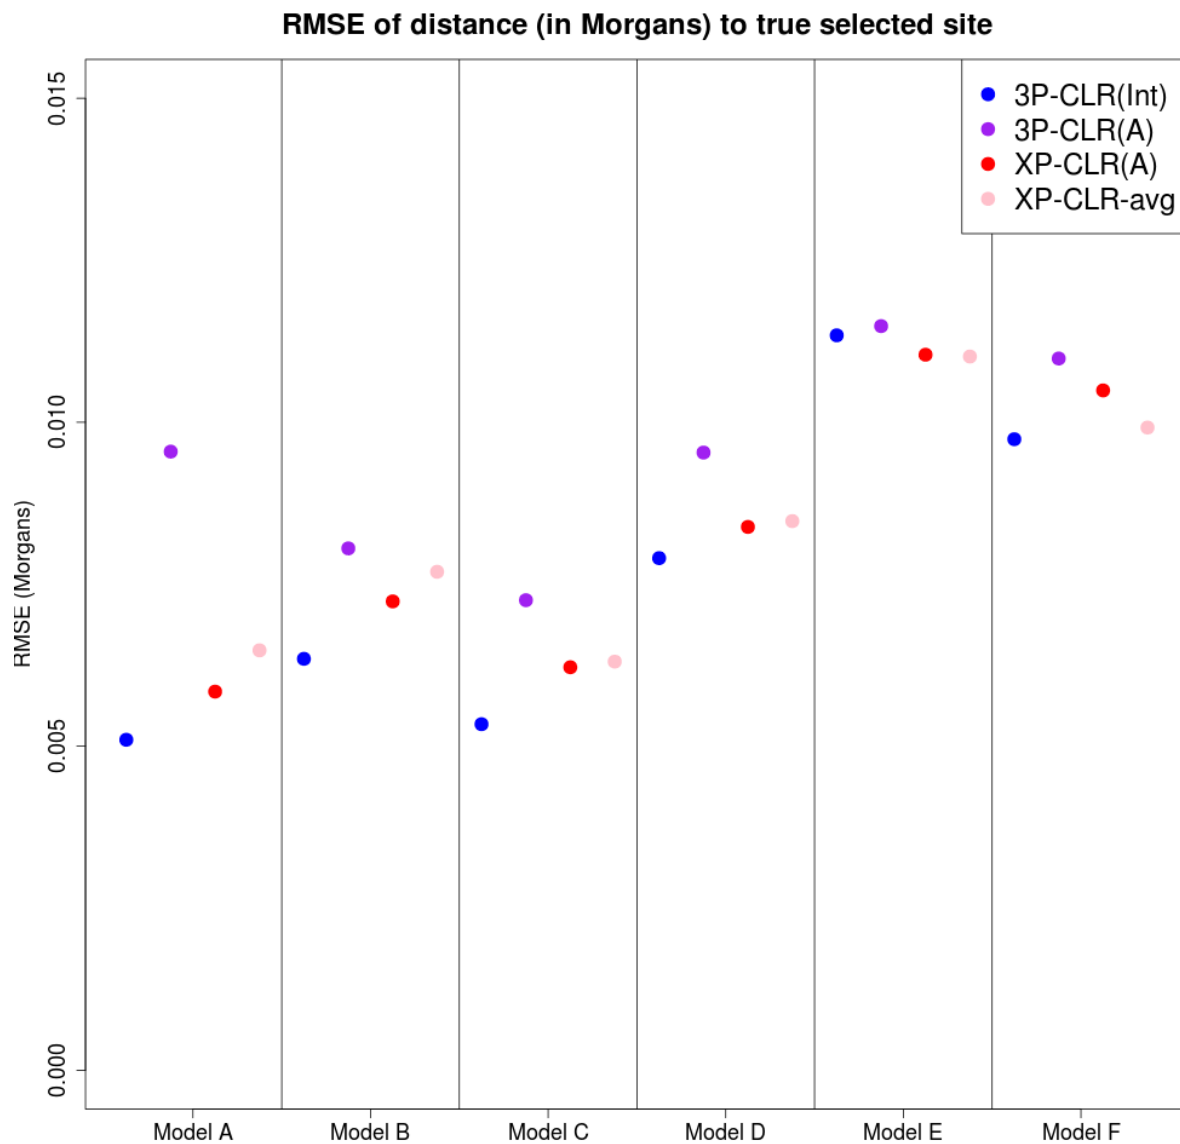

**Figure S2.** Root-mean squared error for the location of sweeps inferred by 3P-CLR(Int), 3P-CLR(A) and two variants of XP-CLR under different demographic scenarios, when the sweeps occurred before the split of populations *a* and *b*. In this case, the outgroup panel from population *c* contained 100 haploid genomes and the two sister population panels (from *a* and *b*) have 100 haploid genomes each.

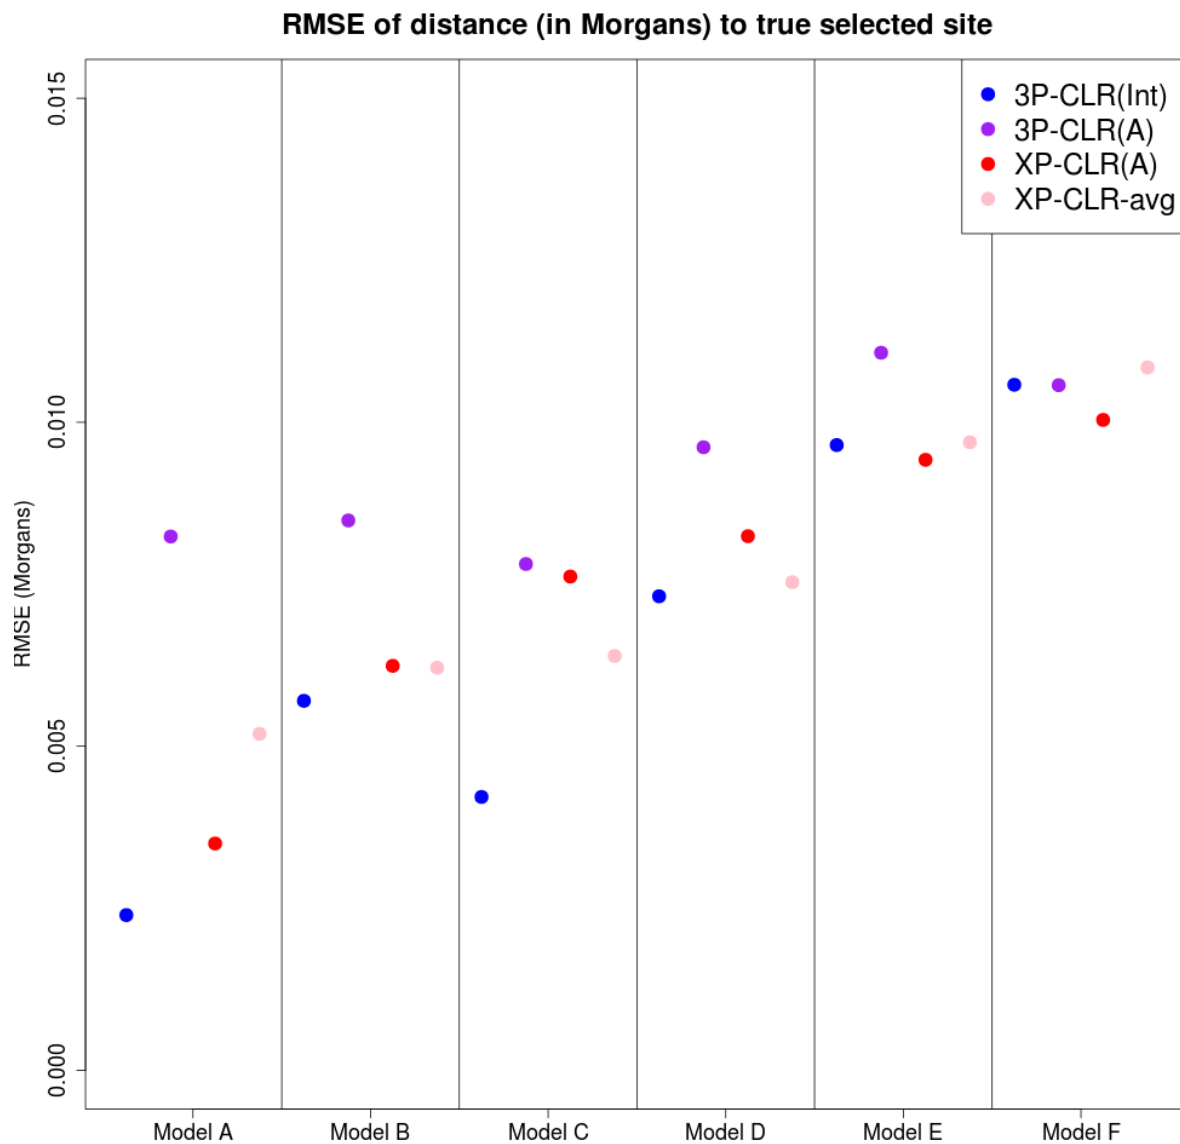

**Figure S3.** Root-mean squared error for the location of the sweep inferred by 3P-CLR(Int), 3P-CLR(A) and two variants of XP-CLR under different demographic scenarios, when the sweeps occurred before the split of populations *a* and *b*. the outgroup panel from population *c* contained 10 haploid genomes and the two sister population panels (from *a* and *b*) have 100 haploid genomes each.

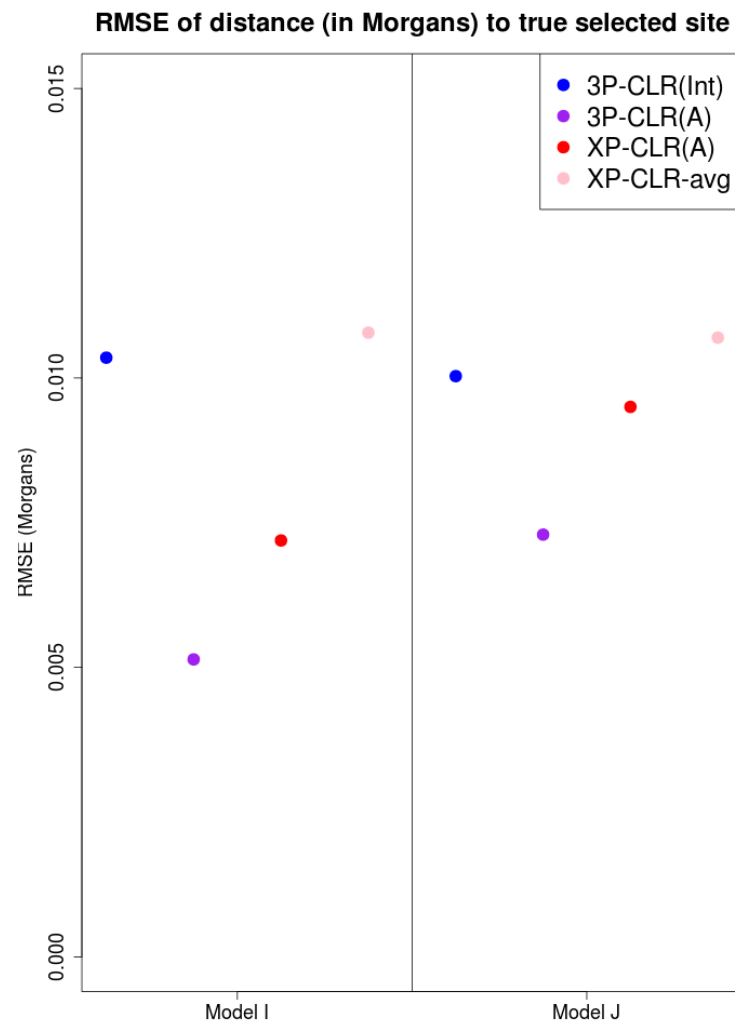

**Figure S4. Root-mean squared error for the location of the sweep inferred by 3P-CLR(Int), 3P-CLR(A) and two variants of XP-CLR under different demographic scenarios, when the sweeps occurred in the terminal population branch leading to population *a*, after the split of populations *a* and *b*. In this case, the outgroup panel from population *c* contained 100 haploid genomes and the two sister population panels (from *a* and *b*) have 100 haploid genomes each.**

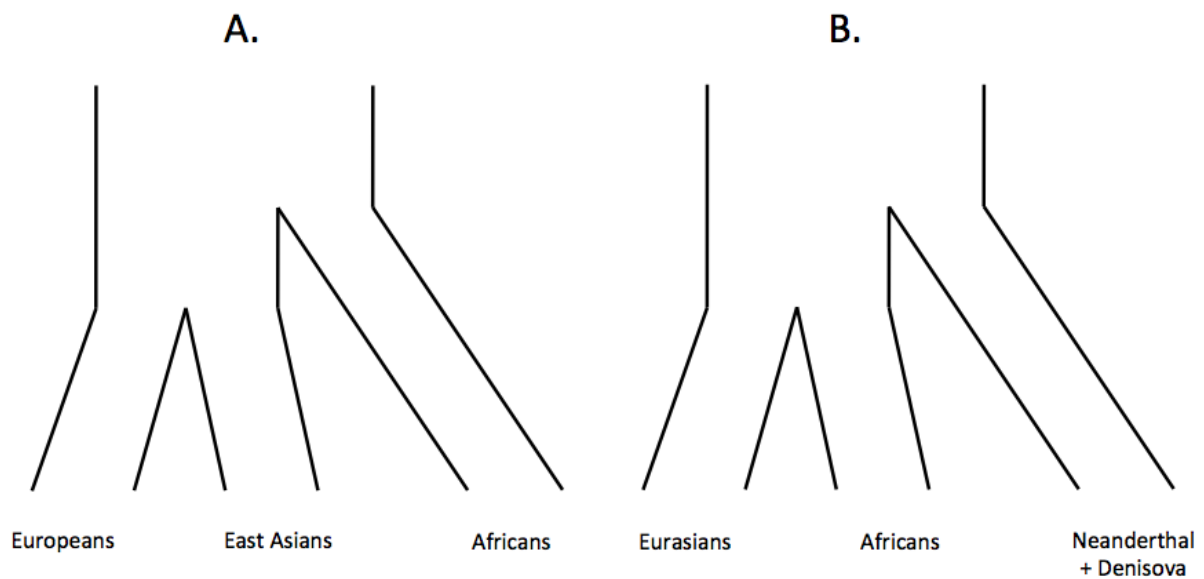

**Figure S5. A. Three-population tree separating Europeans, East Asians and Africans. B. Three-population tree separating Eurasians, Africans and archaic humans (Neanderthal+Denisova).**

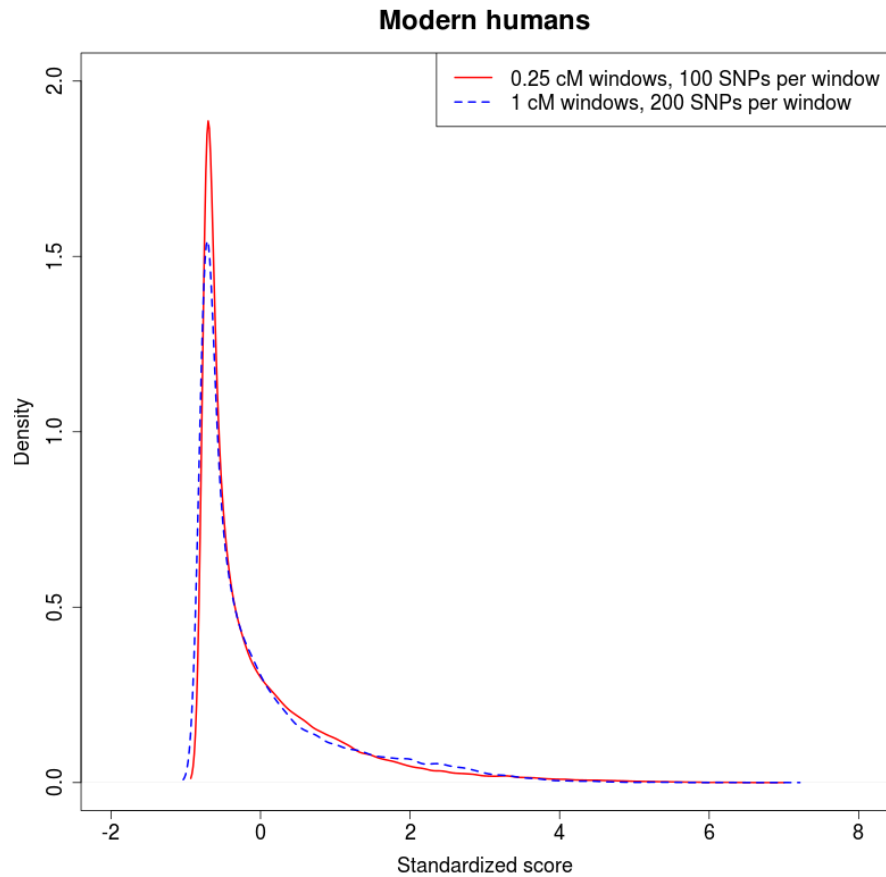

**Figure S6. Comparison of 3P-CLR on the modern human ancestral branch under different window sizes and central SNP spacing.** The red density is the density of standardized scores for 3P-CLR run using 0.25 cM windows, 100 SNPs per window and a spacing of 20 SNPs between each central SNP. The blue dashed density is the density of standardized scores for 3P-CLR run using 1 cM windows, 200 SNPs per window and a spacing of 80 SNPs between each central SNP.



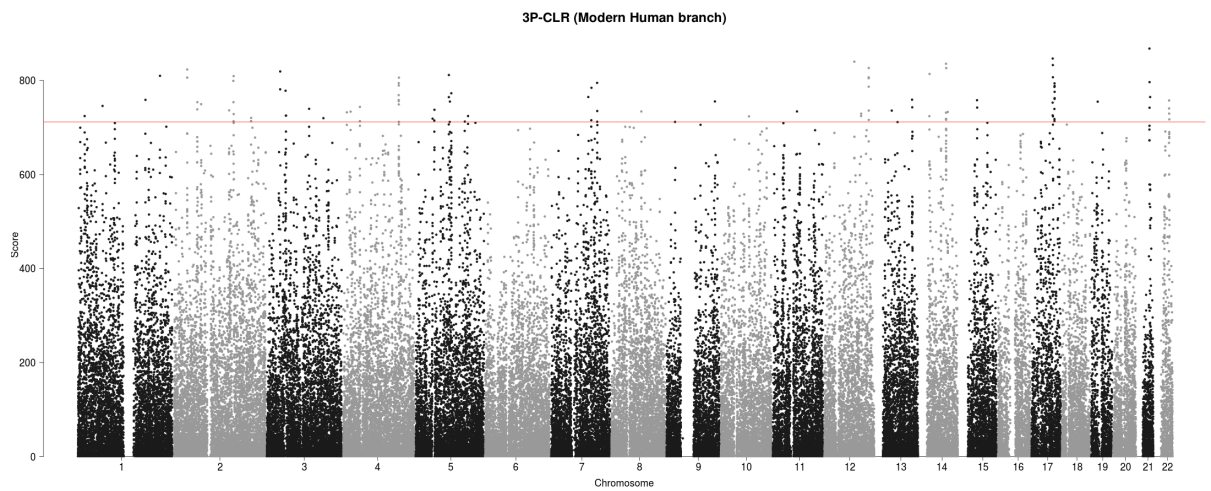

**Figure S7. 3P-CLR scan of the ancestral branch to Africans and Eurasians, using the Denisovan and Neanderthal genomes as the outgroup. The red line denotes the 99.9% quantile cutoff.**

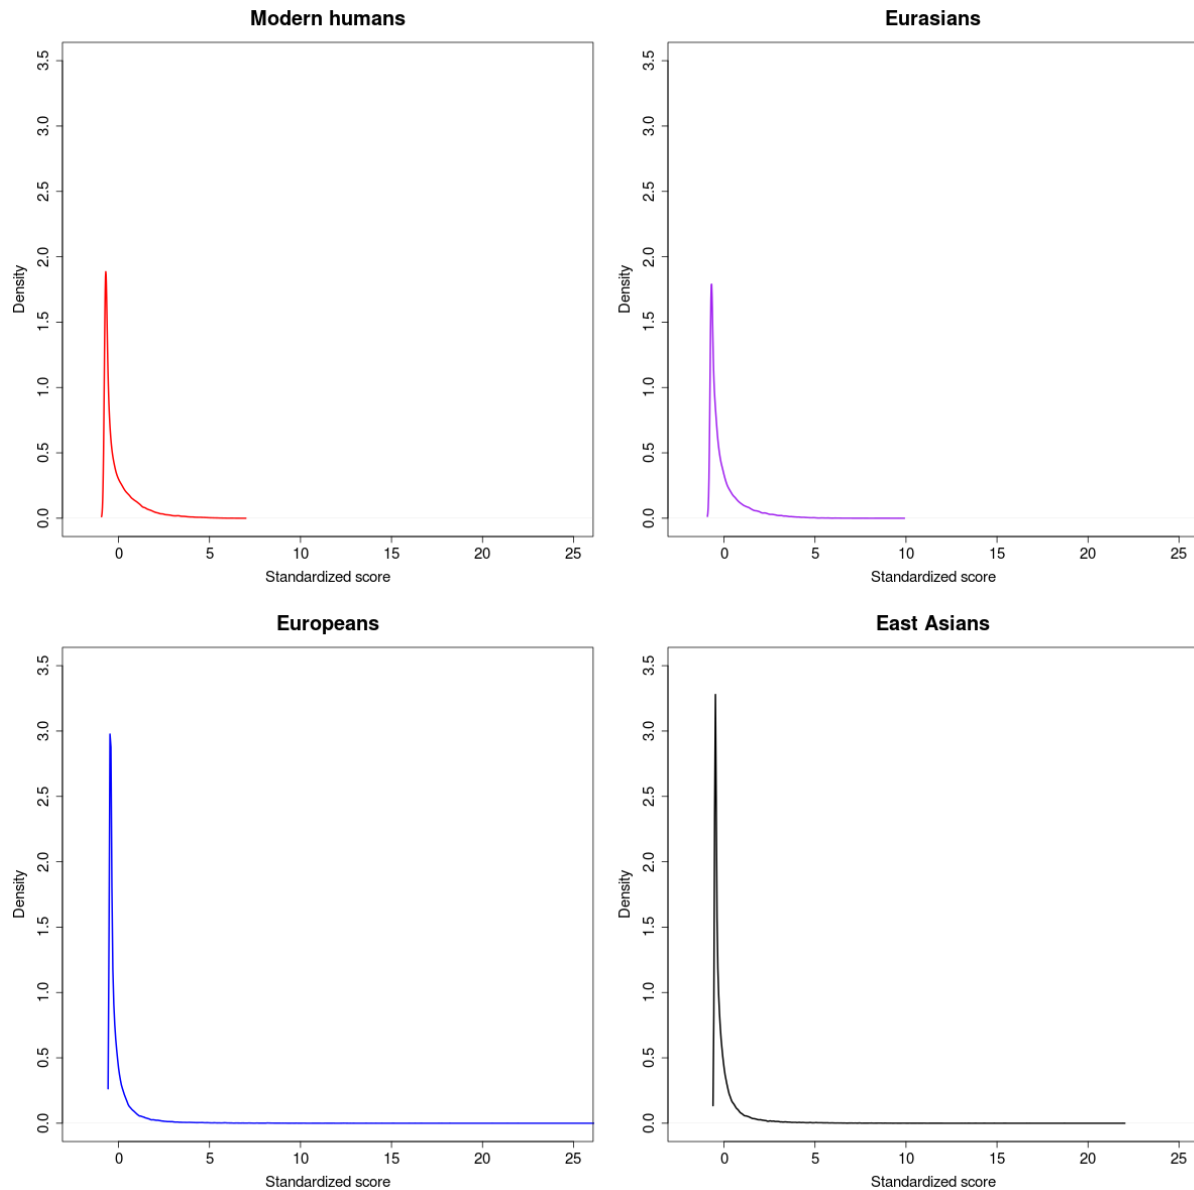

**Figure S8. Genome-wide densities of each of the 3P-CLR scores described in this work.** The distributions of scores testing for recent selection (Europeans and East Asians) have much longer tails than the distributions of scores testing for more ancient selection (Modern Humans and Eurasians). All scores were standardized using their genome-wide means and standard deviations.

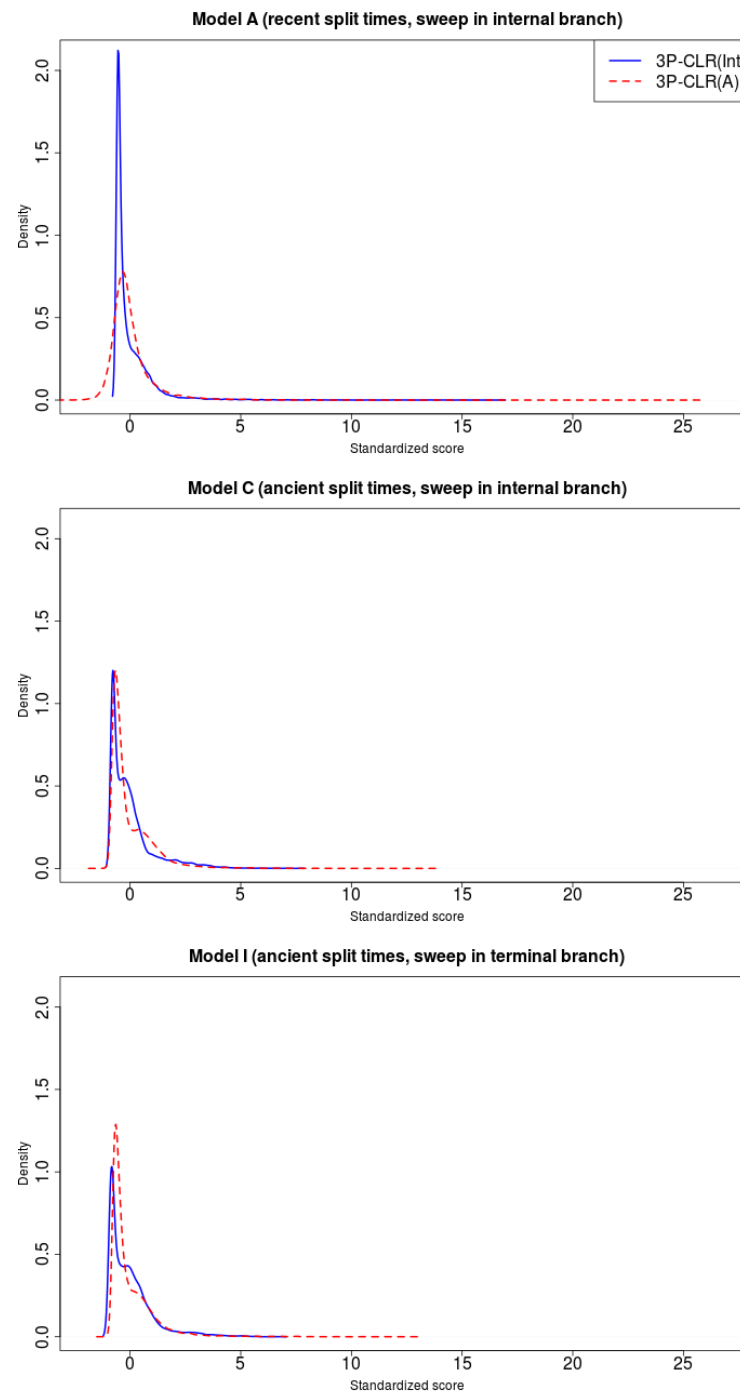

**Figure S9. Distribution of 3P-CLR(Int) and 3P-CLR(A) scores under different demographic histories.** We combined all scores obtained from 100 neutral simulations and 100 simulations with a selective sweep under different demographic and selection regimes. We then plotted the densities of the resulting scores. Top panel: Model A; Middle panel: Model C; Bottom panel: Model I. See Table 1 for details about each model.
